# Supplementary material for: Insights into Endophytic Bacterial Diversity of Rice Grown Across the Different Agro-ecological Regions of West Bengal, India
Source: Research Square preprint supplement (doi:10.21203/rs.3.rs-504039/v1), 2021-08-16
Supplement: Supplementary file 1 [file bdef46980ae606f3b0a9cfd1.xlsx]

## Sheet: Sheet1
OTU	BM_1	BM_2	BM_3	DRJ_5	DRJ_6	DRJ_7	GDH_14	GDH_15	GDH_16	KCH_2	KCH_3	KCH_4	MDH_10	MDH_11	MDH_9	SPI_1	SPI_2	SPI_5
otu1	6571	23458	33651	272	91918	26981	41175	50602	44248	30389	6016	47341	55496	32050	44734	110645	100827	93392
otu2	8	10	1755	42461	636	11721	34887	19557	25624	8940	71854	36496	18410	237	18560	0	21	6
otu3	2278	6168	8299	184	55316	8298	14676	20775	12744	6941	1096	22951	22257	8424	4767	127	384	808
otu4	51	21	257	20757	40504	5171	96	15	10	414	11	12673	2399	424	585	38	1	365
otu5	1	3	264	6	126	1	405	975	4688	14856	27509	568	786	252	942	0	0	0
otu6	2	169	651	11451	3200	2971	604	2891	1570	8566	411	2090	7662	616	7925	1	0	0
otu7	215	468	943	11690	173	2573	794	2013	6557	1017	614	27	4623	3382	4095	45	61	5
otu8	0	0	5	36534	69	75	39	92	51	45	4	17	1	24	6	0	0	0
otu9	0	0	0	43820	4951	1488	2	3	157	372	244	60	243	158	107	3	0	0
otu10	3	0	139	13699	125	148	1002	3032	462	5678	7864	400	2472	138	1123	6	0	0
otu11	2	4	254	2	7	2	1075	9568	24460	2439	1742	485	15644	71	5197	0	2	4
otu12	9	18	0	22077	656	1392	2	16	0	7	3	602	245	93	288	1	1	1550
otu13	3	0	261	41	3	339	88	294	757	3287	17084	316	797	40	230	0	0	0
otu14	6	2	6	1322	4690	832	3	10	47	1904	952	2760	2886	1030	2688	0	0	0
otu15	391	367	228	2	1163	1282	331	356	183	745	166	605	11608	772	1355	5	0	69
otu16	1	0	0	32	15	20100	0	2	1	2	2	439	10	0	1	0	0	1
otu17	11396	10107	1180	0	0	20	5	6	1	0	0	0	4979	3	726	12	9	0
otu18	5	0	0	288	5470	2690	58	1982	7	805	14	177	11	183	6	0	0	0
otu19	0	3	735	2	1	0	329	7507	18	228	1	13	1037	448	2017	0	0	5
otu21	5	5	64	0	10570	422	21	22	5	4	2	22	0	226	75	0	0	0
otu22	27	7	325	1859	491	2222	738	1690	1998	3106	4676	233	472	535	2111	5	0	4
otu23	355	259	567	0	0	0	0	0	0	0	0	0	0	0	0	0	0	0
otu24	1	3	0	365	942	17391	1	2	131	8	0	350	13	1479	25	0	0	0
otu26	0	0	1	118	14	54	0	10	316	7595	1428	13	73	5	2	0	0	0
otu27	2	0	87	1	0	4730	610	556	760	1054	1134	527	897	37	460	0	0	0
otu28	0	0	0	9510	179	524	0	1	0	1	0	0	0	0	0	0	0	0
otu29	22	81	45	26	4	1454	788	399	2060	28	4	154	65	4475	212	0	0	0
otu30	1	0	2	64	32	10146	0	1	2	2	1	3029	315	11	1985	3	0	183
otu31	0	1	164	315	0	3125	801	1690	448	48	64	141	690	50	5757	0	0	0
otu32	429	7923	5610	1	363	0	69	0	0	1	0	0	38	172	17	1	6	0
otu33	1	16	0	47	4785	1314	1	0	2	215	33	5204	144	516	146	0	1	541
otu34	43	955	189	0	850	519	4071	758	108	36	0	133	48	2	1	8	0	2
otu35	0	0	1	4	6	0	22	29	33	5786	2083	106	132	0	3	0	0	0
otu36	30	24	21	355	2816	1604	107	1852	58	21	1	709	556	1335	516	3	22	0
otu37	1986	1420	23078	0	0	0	0	0	0	0	0	0	0	0	0	0	0	0
otu38	0	0	0	0	2	8465	0	0	0	2	0	0	0	0	1	0	0	0
otu39	0	0	0	2	7067	0	0	1	0	0	1	2	0	1	3	0	0	0
otu40	8	2	5	2	6358	130	56	1	1	0	2	0	142	130	259	0	0	0
otu41	0	0	0	1	0	310	45	0	0	5591	0	732	1	0	1	0	0	0
otu42	0	0	23	344	2	1	529	967	3767	177	127	1373	312	36	502	0	0	0
otu43	2	0	24	103	0	0	205	233	165	861	128	6050	149	0	345	0	0	0
otu44	0	0	3	117	1	0	153	134	16	690	5651	1031	129	5	60	0	0	0
otu45	0	0	3	0	169	1	132	644	559	1079	63	0	2282	996	183	48	0	3
otu46	0	0	0	1	1	0	1	0	0	928	20	6104	0	0	0	0	0	0
otu47	2	8	15	8	2	229	68	515	1724	3006	789	72	178	33	635	8	1	0
otu48	17	10869	1	0	0	0	0	0	0	0	0	0	0	0	0	0	0	0
otu49	7	5	18	8	1	1	252	174	223	4611	2249	94	95	90	25	1	9	0
otu50	2673	7978	167	1	38	0	0	0	0	0	0	0	0	0	0	0	2	0
otu51	19	4103	1200	0	0	0	413	2289	4	0	0	2	0	30	0	0	0	5
otu52	0	0	0	11	0	440	0	0	0	3234	122	2452	1	0	0	0	0	0
otu53	0	0	1	173	1	0	22	62	408	1078	2159	300	88	62	37	0	0	0
otu54	0	0	4	1	0	201	182	54	272	4024	20	61	45	0	2	0	0	0
otu55	0	0	0	0	5180	355	0	0	0	0	2	30	0	6	43	0	0	0
otu56	14402	2375	523	1877	457	193	1	0	0	72	0	8	5	17	0	0	0	0
otu57	126	214	181	2694	289	163	1	0	0	16	0	10	8	7	3	0	0	0
otu58	0	5	204	1	0	476	1345	1343	909	261	77	64	114	100	252	0	0	0
otu59	364	1624	2326	0	70	0	1103	3251	661	20	0	21	65	19	14	0	0	0
otu60	79	68	52	1	4232	0	3	14	9	6	0	0	1109	2471	790	0	8	0
otu61	1	14	0	2	1	0	0	0	1	60	0	152	3641	335	847	471	4	1
otu62	7507	4650	19	0	0	0	0	0	0	0	0	0	0	0	0	0	0	0
otu63	1	0	13	5	0	0	337	321	181	613	92	11	4327	39	321	1	0	0
otu64	0	0	0	1	0	0	1	0	0	0	0	4715	0	0	2	0	0	0
otu65	0	0	12	103	120	2605	31	356	1139	900	225	134	192	14	264	0	0	0
otu66	0	0	4	54	788	1251	1212	292	315	1603	228	1649	228	50	353	0	0	0
otu67	0	0	0	0	0	0	1294	1314	1618	0	0	0	0	0	0	6	1	2
otu68	0	3	100	17	4	0	565	1484	2271	2094	1023	3311	335	36	1798	0	1	0
otu69	0	0	0	0	438	0	2	0	43	3319	217	752	1	3	1	0	0	0
otu70	4	77	0	3	2	478	17	128	1	69	24	168	2802	1225	2874	0	0	0
otu71	7	0	92	175	1	105	181	605	348	3944	511	445	26	0	0	1	0	0
otu72	2	0	27	131	2	399	157	232	35	252	1283	3074	1	33	57	0	0	0
otu73	15	9	103	8	5258	1704	17	1	1	1	0	40	59	95	75	0	1	0
otu74	0	0	0	0	38	3786	1	0	0	0	1	0	0	0	0	0	0	0
otu75	0	0	6	45	13	508	0	0	0	671	2799	295	361	57	84	0	0	0
otu76	0	0	0	1	1	0	0	62	0	1700	2005	0	0	0	0	0	0	0
otu77	44	31	94	0	3217	95	111	7	27	3	24	0	57	135	37	0	1	1
otu78	93	4	69	0	1	0	311	2072	1322	1	0	1	160	362	15	10	87	1
otu79	3846	9314	166	0	0	0	0	0	0	0	0	0	0	0	0	0	0	0
otu80	1	4	4	456	0	0	26	623	100	592	563	1	39	67	1597	0	0	0
otu81	0	2	2	40	0	53	5	0	1	0	1	3565	16	1	1	0	0	0
otu82	5103	2428	9	0	0	0	0	0	0	0	0	0	12	0	0	0	0	0
otu83	1296	4231	777	0	0	0	0	0	0	0	0	0	0	0	0	0	0	0
otu84	6	13	17	24	171	0	54	326	1729	126	21	65	56	46	267	3	0	6
otu85	0	0	1	1	1	0	0	0	1	3426	0	0	0	6	1	0	0	0
otu86	0	0	0	0	0	0	0	0	0	0	2672	0	0	0	3	0	0	0
otu87	40	75	0	87	3147	0	0	0	0	0	0	1	1	0	0	0	0	0
otu88	56	55	77	0	0	0	882	569	586	0	0	4	0	1429	49	0	38	0
otu89	1	1	29	203	1	0	59	751	369	3241	163	199	97	14	0	0	0	0
otu90	6053	1	1	0	0	0	0	0	0	0	0	0	0	0	0	0	0	0
otu91	383	0	0	0	0	0	0	0	0	0	0	0	0	0	0	0	0	0
otu92	4	8	0	1	17	1522	2478	1073	176	31	36	368	0	219	2	0	1	20
otu93	1	15	0	15	3816	55	39	0	7	1	0	6	1	17	14	0	0	0
otu94	683	4652	2	0	0	0	0	0	0	0	0	0	0	0	0	0	0	15
otu95	8	5974	0	0	0	0	0	0	0	0	0	0	0	0	0	0	0	0
otu96	3112	1586	28	0	0	0	0	0	0	0	0	0	0	0	0	0	0	0
otu97	5	4	0	737	147	0	273	44	482	2	66	40	56	0	274	0	0	0
otu98	138	7	1	1	1	0	50	0	1717	14	2	0	399	732	118	0	100	1
otu99	73	203	293	1	2	0	1020	2249	452	0	1	2	0	1074	4	114	225	0
otu100	0	0	0	0	2189	1	1	0	1	1	0	18	0	2	0	0	0	2
otu101	0	0	2	0	1	0	0	1	1	40	0	2876	0	0	0	0	0	0
otu102	0	0	3	0	1	116	707	38	95	129	446	805	29	12	1	0	0	0
otu103	360	271	50	0	1	0	298	775	1561	0	1	0	7	490	178	1	0	0
otu104	0	0	22	1	1	1	1765	33	100	0	0	0	0	10	261	0	0	0
otu105	2	4	17	1	0	796	17	675	61	40	14	439	67	0	288	4	1	0
otu106	1	15	28	0	0	0	141	75	1906	0	9	21	257	0	1	0	23	0
otu107	58	33	99	0	80	0	48	82	73	874	111	20	42	511	363	1	0	5
otu108	0	0	0	0	0	0	16	1964	0	0	0	0	0	0	0	0	0	0
otu109	204	100	0	0	0	0	0	0	0	0	0	0	0	0	0	0	0	0
otu110	2	2	2	12	23	120	76	8	0	728	9	358	525	564	167	14	0	0
otu111	0	0	0	0	0	158	667	62	13	6	1	759	1	830	1	0	0	0
otu112	6423	146	0	0	0	0	0	0	0	0	0	0	0	0	0	0	0	0
otu113	0	0	4	0	0	1	40	161	2163	0	13	1	27	0	2	0	0	0
otu114	0	0	148	0	0	0	7	0	1	15	2463	181	0	0	2	0	0	0
otu115	2656	2572	6	0	0	0	0	0	0	0	0	0	0	0	0	0	0	0
otu116	0	0	2	3	0	1	88	9	216	1683	1	399	20	0	0	0	0	0
otu117	76	32	101	0	21	0	8	16	0	786	52	0	196	122	1169	0	0	0
otu118	0	4	12	45	273	3472	0	0	0	1	1	0	1	0	1	0	0	0
otu119	1	0	0	0	1857	247	0	6	0	0	1	13	20	62	32	0	0	0
otu120	6	5	2	1	22	387	102	1	0	55	20	119	1251	540	192	0	2	1
otu121	1	1	1	0	463	274	430	647	61	111	81	202	0	3	1	10	2	0
otu122	0	0	2	26	0	93	499	86	9	211	84	1492	0	0	0	0	0	0
otu123	6	23	2	0	0	0	19	2140	42	0	0	0	0	28	0	0	0	0
otu124	2	0	80	0	0	0	92	103	64	1	26	0	91	4	2472	0	0	0
otu125	69	40	16	0	0	0	71	468	160	0	1	0	357	173	452	0	2	0
otu126	21	16	33	0	0	1	28	4	1	0	1	0	0	1967	1	0	0	0
otu127	2	3	49	33	0	29	571	636	199	213	150	61	55	2	205	0	1	7
otu128	0	0	0	0	2104	0	0	1	0	0	1	0	1	0	0	0	0	0
otu129	0	1	14	0	0	0	40	240	1191	0	1	0	0	78	0	0	0	0
otu130	3248	31	1	0	0	0	0	0	0	0	0	0	0	0	0	0	0	0
otu131	739	353	172	0	870	0	15	0	10	1	0	0	38	28	0	0	36	0
otu132	0	0	0	0	1	1777	0	2	1	0	2	0	0	4	0	9	1	105
otu133	47	4	2629	0	0	0	20	9	0	0	0	0	0	29	0	0	0	0
otu134	2507	949	0	0	0	0	0	0	0	0	0	0	0	0	0	0	0	0
otu135	0	1	0	633	0	0	51	40	7	1082	231	15	0	0	0	0	0	0
otu136	0	0	0	1	1697	0	0	0	0	0	0	0	0	7	0	0	0	0
otu137	1147	281	12	1	1	0	0	0	0	0	1	6	0	727	0	0	1	0
otu138	0	2	3	0	181	0	637	107	26	9	0	95	38	65	251	0	0	0
otu139	9	39	6	0	1581	0	44	7	9	12	0	0	0	58	1	0	0	1
otu140	0	0	1	0	1	0	4	0	0	1616	0	0	0	0	0	0	0	0
otu141	2383	788	11	0	0	0	0	0	0	0	0	0	0	0	0	0	0	0
otu142	0	0	0	0	0	0	0	0	0	0	0	283	0	0	0	0	0	0
otu143	2325	425	42	0	0	0	0	0	0	0	0	0	0	0	0	0	0	0
otu144	0	0	0	0	1748	0	3	0	0	0	0	5	0	2	0	0	0	0
otu145	0	0	0	0	1	0	34	190	15	676	648	118	77	0	0	0	0	0
otu146	0	0	0	668	1009	0	0	0	0	0	0	0	1	0	0	0	0	0
otu147	1	0	8	1	0	1	368	420	813	17	116	0	15	6	174	0	0	1
otu148	1100	1932	6	0	0	0	0	0	0	0	0	0	0	0	0	0	0	1
otu149	63	61	44	0	1	0	71	26	127	805	0	0	110	266	96	0	0	0
otu150	0	1	53	0	732	0	61	61	2	0	0	0	1	702	2	0	0	0
otu151	0	0	0	21	0	1356	124	1	2	0	0	1	0	0	0	0	0	0
otu152	133	107	283	0	0	0	1	16	53	293	140	22	219	187	555	1	0	0
otu153	0	0	0	9	0	1325	0	0	8	0	0	51	67	5	0	0	0	0
otu154	10	20	22	71	14	0	86	103	22	173	0	0	573	23	898	0	0	0
otu155	1	0	70	19	1	1	228	116	193	126	61	22	73	296	209	4	0	0
otu156	49	61	0	0	0	0	0	0	0	0	0	0	0	0	0	0	0	0
otu157	7	0	19	0	0	0	17	47	12	1723	875	0	0	8	0	0	0	0
otu158	0	0	0	0	0	0	18	15	70	43	1114	19	1	0	1	0	0	0
otu159	3	1	1	1	0	0	213	10	0	1	0	0	98	88	1291	0	0	0
otu160	0	0	0	0	0	14	1058	27	201	0	28	34	0	0	0	0	0	0
otu161	0	0	4	0	1207	25	1	0	25	0	0	0	2	0	0	0	0	0
otu162	3	8	6	27	48	22	35	104	108	16	37	3	36	211	2326	1	3	4
otu163	0	1	0	16	934	200	167	0	1	0	1	23	0	1	0	0	0	0
otu164	0	0	0	0	0	0	0	0	8	1143	112	24	0	0	2	0	0	0
otu165	1	3	1	0	0	0	3	4	1359	30	0	0	0	2	0	0	0	0
otu166	0	0	0	0	1382	0	0	0	0	1	0	0	0	0	0	0	0	0
otu167	12	11	8	0	652	555	156	150	0	0	0	0	152	806	1	12	0	0
otu168	43	108	30	0	1	0	123	0	1002	0	0	66	0	3	1	0	2	0
otu169	1	4	43	33	564	63	77	182	147	612	4	0	0	85	0	3	0	0
otu170	19	5	10	118	115	80	96	185	234	35	18	14	62	37	315	3	1	4
otu171	2064	318	1	0	0	0	0	0	0	0	0	0	10	0	0	0	0	0
otu172	3	17	230	0	152	82	46	6	28	137	309	148	70	150	57	0	0	0
otu173	2	26	2	5	4	408	0	17	35	2030	33	208	720	248	347	177	7	2376
otu174	3	0	0	30	44	24	26	1	2	359	0	329	162	329	191	72	95	11
otu175	152	23	0	0	0	0	0	0	0	0	0	0	0	0	2	0	0	0
otu176	7	140	11	0	2	0	0	0	1	1	0	1	0	1128	0	0	0	0
otu177	182	554	123	183	36	0	0	27	174	250	34	0	0	71	0	0	0	0
otu178	0	0	1	0	4	11	75	221	127	273	83	0	38	20	355	0	0	0
otu179	0	0	0	57	98	1019	0	0	0	0	0	0	0	0	0	0	0	0
otu180	0	0	1	21	0	865	0	381	0	19	0	0	36	7	0	0	2	0
otu181	3	2	123	0	0	972	0	0	1	0	43	0	0	0	0	6	0	0
otu182	0	0	0	3	1	0	2	1	3	0	0	1	0	1229	1	0	0	0
otu183	0	0	0	0	0	0	0	0	1	5	0	0	297	69	1717	0	0	1
otu184	0	0	15	71	0	9	70	89	52	46	629	48	8	0	47	1	0	0
otu185	0	0	0	0	0	1398	0	0	0	1	1	0	0	0	0	0	0	0
otu186	11	55	357	16	0	911	110	24	351	0	4	0	9	5	9	8	0	0
otu187	0	0	8	0	0	0	0	912	11	0	0	0	0	55	0	0	0	0
otu188	0	1	2	0	1	0	50	757	789	30	65	0	0	22	0	0	0	0
otu189	0	0	0	0	0	0	2	0	68	1785	6	0	1	0	1	0	0	0
otu190	0	0	1	1	155	656	13	28	3	102	0	12	73	0	89	0	0	0
otu191	0	8	3	0	0	26	486	2	987	1	0	11	6	0	0	0	0	0
otu192	0	0	0	2	1	0	0	0	0	0	0	0	0	39	1099	0	1	4
otu193	31	0	0	0	0	2	0	26	0	5	0	0	0	57	1	40	3	3319
otu194	0	0	0	45	0	973	0	0	0	0	0	0	0	0	0	0	0	0
otu195	121	2000	1	0	0	0	0	0	0	0	0	0	0	0	0	0	0	0
otu196	0	0	0	41	47	620	26	3	0	0	121	43	42	2	54	0	0	0
otu197	2033	1122	77	0	0	0	0	0	0	0	0	0	0	0	102	0	0	0
otu198	0	0	0	0	0	0	927	0	4	0	0	0	0	0	1	0	0	0
otu199	0	1	1	0	0	2	30	38	15	0	0	25	68	0	1037	0	0	0
otu200	1	0	6	0	0	270	138	76	0	97	33	1552	0	15	28	0	0	0
otu201	0	0	0	0	0	0	0	0	0	51	0	0	253	0	1082	0	0	0
otu202	32	42	21	21	0	0	0	0	70	775	0	0	8	63	23	0	0	0
otu204	259	195	114	0	429	0	51	52	17	49	0	175	11	61	0	0	1	0
otu205	0	0	0	1105	17	0	0	0	0	0	20	0	0	0	0	0	0	0
otu206	0	0	0	0	0	0	0	0	0	84	1	0	2	1	2	2	0	46
otu207	0	0	5	3	0	4	34	182	446	19	90	31	267	0	83	0	0	0
otu208	102	8	1	3	1	1	1272	30	3	0	0	0	189	992	8	0	1	0
otu209	0	0	0	0	39	0	0	0	0	110	148	31	1701	0	713	0	0	0
otu210	1	1	2	57	201	276	0	40	0	65	62	6	74	10	27	0	0	0
otu211	0	1	1	0	0	3	0	0	0	7	1	6	23	7	9	2	0	35
otu212	0	0	0	0	0	0	18	45	915	0	67	0	0	21	1	0	0	0
otu213	88	3	0	0	0	0	0	0	0	0	0	0	0	0	3	0	0	0
otu214	0	4	11	0	1	0	0	21	350	183	0	0	299	16	132	0	0	0
otu215	0	0	3	0	0	0	1	71	638	232	0	0	0	0	0	0	0	0
otu216	188	9	2	0	0	0	0	0	0	0	0	0	313	315	444	0	0	0
otu217	8	27	726	12	469	245	3	0	0	0	0	0	0	0	0	1	0	0
otu218	2	1	14	0	0	0	93	367	238	6	0	1	0	1	0	0	0	0
otu219	196	671	835	0	16	0	0	0	0	0	1	0	0	11	0	0	0	0
otu220	0	0	1	1	0	0	0	22	789	220	0	0	75	0	148	0	0	0
otu221	28	164	3	114	817	0	0	0	0	16	0	0	0	0	0	0	0	0
otu222	0	0	0	1	0	0	2	0	20	993	0	0	13	0	6	0	0	0
otu223	0	0	0	0	0	0	0	0	4	174	0	0	0	0	0	0	0	0
otu224	0	0	0	0	0	0	0	107	0	0	514	0	48	0	24	0	0	0
otu225	31	0	1	0	585	278	0	0	0	11	6	12	66	0	5	0	0	0
otu226	0	0	1917	0	0	0	0	0	0	0	0	0	0	0	0	0	0	0
otu227	1	0	21	0	0	0	0	0	222	632	0	14	120	5	0	20	0	0
otu228	0	0	0	0	0	0	0	0	0	0	0	0	0	14	480	0	0	0
otu229	9	21	6	0	0	0	144	21	27	0	578	19	0	194	328	0	0	0
otu230	0	3	1588	0	0	0	0	0	0	0	0	0	0	0	0	0	0	0
otu231	1018	366	264	0	14	0	0	0	0	10	0	0	0	0	0	0	0	0
otu233	3	12	0	16	153	45	662	151	1	0	1	36	14	294	0	0	0	0
otu234	220	222	128	1	22	0	13	1	0	0	1	1	29	432	90	0	0	0
otu235	21	11	0	0	0	0	6	4	0	0	0	0	554	371	81	0	0	0
otu236	7	4	38	0	27	0	2	12	29	928	4	0	42	8	0	2	0	0
otu237	0	0	108	0	0	0	0	0	0	0	0	0	0	0	0	0	0	0
otu238	0	0	32	0	0	36	173	26	484	32	71	132	0	19	256	0	0	0
otu239	0	0	7	1	1	0	68	69	377	101	5	0	0	80	23	14	0	5
otu240	0	0	0	0	0	0	0	3	63	19	0	0	11	0	14	0	0	0
otu241	0	0	2	0	0	0	0	95	52	595	79	0	0	0	161	21	1	2
otu242	0	0	0	0	0	0	0	0	0	0	0	762	0	0	0	0	0	0
otu243	0	0	0	0	0	0	0	5	3	699	50	0	0	0	0	0	0	0
otu244	36	75	95	3	302	19	65	97	79	41	8	153	97	70	24	1	3	6
otu245	0	0	0	1	1	0	0	0	0	0	546	0	0	245	0	0	0	0
otu246	1	0	10	0	0	0	9	0	19	1251	24	0	0	20	1	0	0	0
otu247	14	3	4	0	831	0	13	0	0	0	0	37	0	0	0	0	0	0
otu248	2	2	26	122	0	63	30	257	181	430	55	167	60	8	38	0	0	0
otu249	946	116	333	0	1	0	0	0	1	0	0	0	0	154	0	1	0	0
otu250	0	0	0	0	0	0	1	50	0	0	0	0	619	192	72	2	0	0
otu251	0	0	7	1	0	0	25	246	157	8	21	31	58	0	290	0	0	0
otu252	3	13	0	0	0	0	0	0	5	0	0	0	328	6	658	0	0	0
otu253	0	0	0	0	0	0	3	740	0	0	0	0	43	0	0	0	0	0
otu254	0	1	0	0	237	0	40	0	480	0	0	0	0	0	0	0	0	0
otu255	1	3	3	0	21	203	297	148	289	37	1	369	0	0	0	0	0	1
otu256	1	12	4	0	0	1	17	395	367	201	40	0	480	67	0	0	2	0
otu257	28	19	8	0	17	0	5	5	1	5	0	16	1	7	0	0	0	0
otu258	0	0	5	0	791	0	0	1	0	0	0	27	0	0	0	0	0	0
otu259	0	0	71	0	0	0	476	9	8	0	104	48	17	0	0	0	0	0
otu260	0	0	0	0	0	0	9	19	19	21	568	10	72	18	0	0	0	0
otu261	0	0	2	0	0	0	105	7	295	105	185	407	8	14	0	0	0	0
otu262	0	0	0	6	11	19	4	0	0	2167	7	245	21	9	0	0	0	0
otu263	103	63	98	0	0	0	102	45	314	52	0	0	0	13	1	0	0	0
otu264	114	1331	3	0	0	0	0	0	0	0	0	0	0	0	0	0	0	0
otu265	16	27	42	0	1	0	0	0	0	0	0	0	0	0	0	0	0	0
otu266	1	1	3	0	64	377	0	0	17	40	62	0	29	0	54	0	0	0
otu267	648	862	0	0	0	0	0	0	0	0	0	0	0	0	0	0	0	0
otu268	0	1	22	0	1	0	48	7	384	156	14	17	0	0	2	0	0	0
otu269	2	4	2	0	0	0	6	33	427	341	73	0	0	17	0	0	0	0
otu270	269	1349	1	0	0	0	0	0	0	0	0	0	0	0	0	0	1	2
otu271	0	0	0	1	0	0	0	0	0	0	0	1096	0	1	0	0	0	0
otu272	18	1076	0	5	0	194	0	0	0	0	0	0	0	0	0	0	0	0
otu273	50	0	2	0	4	0	0	0	0	3	0	0	880	0	0	0	0	0
otu274	0	0	30	21	0	0	113	75	0	31	720	0	0	0	0	8	0	0
otu275	400	855	3	1	0	0	0	0	0	0	0	0	0	0	0	0	0	0
otu276	1	3	1	0	292	138	0	1	0	1	1	0	257	65	15	0	0	0
otu277	0	0	7	0	33	64	172	335	86	0	6	1	39	0	0	1	0	0
otu278	3	0	20	0	117	203	19	0	14	177	7	0	125	52	195	0	0	0
otu279	1	3	2	0	57	12	32	32	13	10	1	30	31	17	5	0	1	1
otu280	13	823	968	0	0	0	0	0	0	0	0	0	0	0	0	0	0	0
otu281	670	39	32	1	0	0	0	0	0	16	0	1	157	95	0	0	0	0
otu282	0	0	2	0	0	0	20	116	501	6	89	26	272	0	65	0	0	0
otu283	0	0	1	1	1	0	26	0	10	11	0	0	0	450	146	0	0	0
otu284	1	0	1	31	27	0	0	5	16	0	254	0	152	0	263	18	0	0
otu285	1	2093	21	0	0	0	0	0	0	0	0	0	0	0	0	0	0	0
otu287	0	0	3	0	15	146	22	106	148	78	19	25	76	54	94	11	0	0
otu288	0	0	0	38	85	394	26	0	58	63	21	0	83	5	16	0	0	0
otu289	0	0	1	0	0	0	38	1	16	124	250	0	0	13	0	0	0	0
otu290	0	2	0	0	0	0	0	0	0	372	0	0	39	21	0	0	0	0
otu291	0	0	0	0	0	0	0	0	729	1	0	0	0	0	0	0	0	0
otu292	0	0	0	0	0	0	0	0	0	0	0	1	0	0	737	0	0	0
otu293	2	0	0	0	122	313	65	29	57	0	0	22	0	0	61	0	0	0
otu294	0	0	1	0	146	53	36	0	56	21	259	0	111	14	27	0	0	0
otu295	0	0	7	0	0	0	342	14	3	43	78	32	0	0	0	0	0	0
otu296	0	0	0	0	0	0	0	0	53	207	0	0	80	0	373	2	0	0
otu297	1	0	0	0	0	0	0	0	0	0	0	0	0	5	995	0	0	0
otu298	0	0	0	1	0	0	0	876	0	0	0	1	0	0	0	0	0	0
otu299	0	0	0	0	642	0	0	0	0	0	0	0	0	0	0	0	0	0
otu300	0	0	8	0	0	0	32	456	56	238	10	1	0	6	39	0	0	0
otu301	538	611	0	0	0	0	0	0	0	0	0	0	0	0	0	0	0	0
otu302	0	0	0	0	0	0	0	694	0	0	0	0	1	0	0	0	0	0
otu303	96	273	58	0	0	135	12	257	14	0	0	0	1	2	1	0	0	0
otu304	0	0	0	0	0	652	210	28	26	0	28	159	1	63	1	0	0	0
otu305	0	0	0	0	0	0	0	639	3	0	0	0	0	0	0	0	0	0
otu306	36	0	0	0	0	0	17	0	0	412	0	13	0	2	187	0	0	0
otu307	0	0	0	253	0	194	0	0	7	171	0	0	0	12	0	0	0	0
otu308	0	0	0	0	0	0	23	0	0	28	0	0	605	66	1	0	0	0
otu309	5	0	0	0	1	0	0	0	0	0	0	0	619	10	143	0	0	1
otu310	0	7	11	0	0	0	20	199	175	31	0	28	59	37	23	0	0	1
otu311	8	21	30	0	0	0	0	541	0	0	0	0	0	0	12	0	0	0
otu312	22	27	63	10	1	51	58	11	1	8	0	53	132	238	34	1	0	6
otu313	44	30	31	0	72	58	152	36	61	0	0	0	0	395	94	0	0	0
otu314	0	0	0	0	0	0	1	1	41	1	1	1	1	0	1	0	0	0
otu315	108	83	2	21	15	762	0	0	0	0	0	0	0	6	0	0	0	1
otu316	0	21	35	0	0	0	0	0	0	0	0	0	0	0	0	0	0	0
otu317	0	0	0	0	0	0	9	0	0	0	0	1	0	712	0	5	1	0
otu318	835	1195	2	0	0	0	0	0	0	0	0	0	0	0	0	0	0	0
otu319	0	0	3	1	0	1	4	6	44	29	786	19	21	0	3	0	0	0
otu320	0	5	0	0	114	605	17	36	0	91	15	35	12	30	67	0	0	0
otu321	0	0	0	7	0	0	0	810	0	1	0	0	0	0	0	0	0	0
otu322	0	0	0	655	3	0	3	0	18	0	61	0	0	3	0	0	0	0
otu323	0	0	0	0	0	0	0	0	3	2	75	2	0	0	0	0	0	0
otu324	81	148	0	0	0	0	0	0	0	0	0	0	0	0	0	0	0	0
otu325	0	0	8	51	65	0	54	0	288	60	205	0	52	0	18	0	0	0
otu326	0	1	2	0	0	464	0	0	0	0	0	0	0	0	0	0	0	0
otu327	0	0	0	0	0	0	0	0	0	0	0	874	0	0	0	0	0	0
otu328	0	0	0	0	1	1	8	3	29	2	2	0	0	1240	1	0	0	0
otu329	0	0	0	1	0	0	16	21	879	117	0	0	199	0	290	0	0	0
otu330	0	0	0	0	0	0	2	0	57	2	0	0	5	0	2	0	0	0
otu331	0	0	0	0	0	1	0	0	0	0	1	12	372	0	328	0	0	0
otu332	0	2	2	0	0	0	0	17	0	27	0	58	60	0	762	0	0	0
otu333	350	605	525	0	0	0	0	0	0	0	0	0	11	0	198	0	0	0
otu334	0	0	24	0	0	0	49	394	12	47	0	12	0	27	0	0	0	0
otu335	0	165	1	0	0	0	0	0	0	0	0	0	0	0	0	0	0	0
otu336	0	1	2	23	42	165	12	67	27	22	0	13	94	4	39	0	0	0
otu337	0	1	3	0	0	0	0	14	103	95	309	0	0	77	67	0	0	0
otu338	1	6	1	221	86	0	133	17	227	48	74	72	63	5	131	1	1	0
otu339	0	36	29	0	627	0	42	0	79	0	0	0	0	0	0	0	3	0
otu340	0	0	6	0	0	0	0	0	73	301	267	0	64	27	31	0	0	0
otu341	0	0	0	0	542	0	11	0	0	1	0	0	0	0	0	0	0	0
otu342	0	0	0	0	582	0	0	0	0	0	0	0	0	0	0	0	0	0
otu343	0	0	3	75	80	57	15	50	85	15	0	13	35	3	99	0	0	0
otu344	0	0	0	0	630	0	0	0	0	0	2	0	0	0	0	0	0	0
otu345	0	0	1	0	0	36	0	129	82	233	97	0	6	0	77	0	0	0
otu346	0	0	0	0	0	0	0	0	0	0	0	46	0	0	0	0	0	0
otu347	0	0	0	0	0	0	0	10	30	271	338	0	0	0	0	2	0	0
otu348	0	0	0	19	272	265	0	0	0	17	0	0	39	1	98	0	0	1
otu349	0	0	1	0	0	0	0	0	0	0	589	8	0	0	0	0	0	0
otu350	0	0	1	0	1	0	1	2	0	60	19	1367	0	0	0	0	0	0
otu351	0	0	0	0	0	0	0	0	2	17	0	0	10	0	37	0	0	0
otu352	0	0	0	0	0	0	0	548	0	0	0	1	0	0	0	0	0	0
otu353	0	0	0	0	1	0	0	0	585	0	0	0	0	0	1	0	0	0
otu354	0	0	0	593	7	0	0	0	0	8	0	0	0	0	0	0	0	0
otu355	8	1	1	0	0	0	0	0	0	18	0	0	438	2	0	0	1	0
otu356	0	0	0	0	484	0	0	0	0	0	0	1	0	0	0	0	0	0
otu357	0	0	0	0	0	0	31	417	4	0	1	0	0	141	0	0	0	0
otu358	0	0	0	0	0	431	0	0	0	0	0	0	0	0	0	0	0	0
otu359	0	3	0	0	0	0	0	38	323	137	39	0	62	2	24	0	2	0
otu360	0	0	0	0	43	628	0	0	0	60	7	0	15	0	0	0	0	0
otu361	0	0	1	0	0	0	0	14	456	2	210	0	0	0	0	0	0	0
otu363	0	0	27	0	0	0	37	0	0	208	481	13	0	0	0	0	0	0
otu364	0	0	1	0	0	355	0	77	48	14	0	16	0	0	0	0	0	0
otu365	1	1	1	51	164	268	0	0	0	0	0	0	11	0	0	0	0	0
otu366	0	2	6	0	0	0	0	52	138	145	0	0	0	97	81	0	0	0
otu367	180	400	148	0	13	0	20	2	0	0	0	0	89	9	0	0	10	12
otu368	0	0	0	0	0	0	0	406	0	0	0	0	0	0	0	0	0	0
otu369	231	0	0	33	0	300	0	0	0	0	52	72	0	0	2	0	0	0
otu370	6	29	1	0	0	0	415	135	23	0	0	16	0	22	0	0	0	0
otu371	0	0	0	0	0	0	10	135	0	8	0	431	0	0	0	0	0	0
otu372	1	275	178	8	75	0	121	0	0	0	0	1	0	58	0	0	0	0
otu373	0	0	2	0	343	0	0	0	14	0	0	0	55	0	0	0	0	0
otu374	0	0	0	53	0	0	0	0	2	0	5	0	0	1	0	0	0	0
otu375	0	0	0	570	21	0	14	0	323	96	164	28	0	0	2	0	0	0
otu376	106	1	1	0	0	0	0	8	26	22	0	0	49	169	625	0	1	0
otu377	0	0	0	0	0	0	0	0	0	450	0	0	0	1	0	0	0	0
otu378	5	2	0	0	0	0	0	1	0	0	0	0	64	429	65	5	0	0
otu379	0	0	0	0	0	0	0	0	0	301	132	0	0	1	0	0	0	0
otu380	190	308	1719	38	25	0	110	0	0	0	0	0	0	11	0	10	0	0
otu381	1043	248	4	1	0	0	0	0	0	0	0	0	0	0	0	0	0	0
otu382	0	0	2	0	0	61	0	0	17	390	3	65	0	0	0	0	0	0
otu383	1	1	22	93	114	289	0	0	0	0	0	0	0	1	0	0	0	0
otu384	0	0	0	16	0	0	14	30	107	22	158	79	5	0	16	0	0	0
otu385	4	777	0	0	0	0	0	0	0	0	0	0	0	0	0	0	0	0
otu386	0	2	0	0	0	404	98	84	0	0	1	0	0	0	0	0	0	0
otu387	0	0	0	0	0	0	0	42	0	0	0	0	418	33	48	0	0	0
otu388	0	0	0	23	0	0	0	0	15	3	8	0	0	0	0	0	0	0
otu389	0	0	7	0	462	0	0	183	0	0	0	0	0	0	0	2	0	0
otu390	3	1	2	2	0	0	37	54	17	78	223	0	0	14	1	0	0	0
otu391	12	5	121	0	1	0	0	66	12	351	61	0	0	44	0	0	0	0
otu392	0	0	0	0	0	0	10	3	12	385	0	0	0	0	0	0	0	0
otu393	0	0	0	0	529	0	0	0	0	1	0	0	0	0	0	0	0	0
otu394	9	41	0	0	1	0	4	89	0	0	0	0	27	317	204	0	0	0
otu395	0	1	0	0	0	0	0	0	0	116	0	0	16	12	0	0	0	0
otu396	0	0	1	0	469	0	0	1	0	0	0	0	0	0	1	0	0	0
otu397	1	20	2	291	141	0	0	0	0	0	0	0	0	0	0	0	0	0
otu398	0	0	22	0	0	0	65	7	65	294	29	16	0	4	3	0	0	0
otu399	0	0	1	0	1	0	0	0	0	150	0	78	54	298	1	0	0	4
otu400	0	0	0	0	0	243	11	0	0	64	47	0	20	0	95	0	0	0
otu401	0	0	0	0	0	0	0	0	0	119	0	35	474	0	0	0	0	0
otu402	19	40	85	0	221	6	28	65	47	13	0	100	107	28	11	19	5	30
otu403	4	0	2	0	2	10	8	5	7	0	0	0	0	1	0	0	0	0
otu404	0	0	0	0	0	0	0	0	0	0	587	9	1	0	0	0	0	0
otu405	0	0	0	0	266	168	0	0	0	0	0	83	0	0	0	0	0	0
otu406	0	0	1	1	3	0	0	0	0	0	0	337	30	0	131	0	0	13
otu407	0	0	5	0	0	0	0	6	0	0	0	0	405	5	0	0	5	1
otu408	16	22	179	1	1	0	13	0	0	0	0	0	0	1	0	1	0	0
otu409	0	0	0	0	0	0	0	0	0	0	0	338	0	0	0	0	0	0
otu410	0	0	0	0	0	0	0	0	0	348	0	0	0	0	0	0	0	0
otu411	3	1	0	0	0	0	47	117	20	13	101	0	0	5	0	0	0	0
otu412	0	0	0	0	0	0	22	6	0	534	0	0	45	1	0	0	0	0
otu413	0	0	131	0	0	0	27	232	80	68	0	12	24	16	232	0	0	0
otu415	14	17	15	1	0	0	3	2	0	4	0	0	0	115	295	0	2	0
otu416	0	0	0	0	0	0	0	0	0	0	0	0	750	0	0	0	0	0
otu417	14	29	21	0	0	0	0	0	0	0	0	0	0	0	6	0	0	0
otu418	0	0	1035	0	0	0	0	0	0	0	0	0	0	0	0	0	0	0
otu419	0	0	3	0	0	0	182	52	0	0	80	98	0	0	0	0	0	0
otu420	99	264	1	0	0	0	0	0	8	0	0	0	206	247	0	0	0	0
otu421	0	0	5	0	0	0	0	1	23	293	0	152	0	0	1	0	0	0
otu422	0	0	2	0	0	0	0	0	0	0	412	0	1	97	0	0	0	0
otu424	0	0	0	0	0	0	0	6	0	0	0	0	0	446	2	0	0	0
otu425	7	33	11	1	1	0	12	61	15	0	78	0	0	222	0	0	1	0
otu426	1	33	0	0	0	0	0	0	0	0	0	0	0	0	0	0	0	0
otu427	0	0	0	0	0	0	0	0	0	0	67	2	0	0	0	0	0	0
otu428	34	19	31	0	12	34	0	0	0	0	0	22	46	299	47	0	0	0
otu429	0	2	1	0	0	0	20	0	0	21	39	6	37	0	213	26	1	0
otu430	2	17	172	0	40	267	0	0	0	39	17	0	0	119	0	0	0	0
otu431	0	1	1	0	0	0	0	1	0	0	0	0	0	38	5	0	0	0
otu432	0	0	0	0	434	0	0	6	0	0	0	0	0	8	0	0	0	0
otu433	0	0	0	0	0	0	0	0	0	0	0	0	321	0	0	0	0	0
otu434	0	0	1	15	0	238	6	0	35	0	0	338	0	0	1	0	0	0
otu435	0	0	0	0	0	0	0	0	0	0	0	0	594	0	0	0	0	0
otu436	0	0	1247	0	0	0	0	0	0	0	0	0	0	0	0	0	0	0
otu437	0	0	3	0	0	0	0	0	0	21	0	0	23	0	417	0	0	2
otu438	0	0	0	0	0	0	0	0	0	5	0	0	84	0	354	0	0	0
otu439	0	0	0	0	0	0	75	72	12	0	0	0	0	19	0	3	4	0
otu440	0	8	5	27	20	244	0	2	281	295	0	0	53	91	94	0	0	0
otu441	2	3	12	0	1	0	38	20	0	0	0	0	0	191	304	0	4	0
otu442	0	0	0	6	19	418	0	0	0	1	0	36	12	0	0	0	0	0
otu443	0	0	0	0	78	467	0	5	0	0	0	0	1	0	1	0	0	0
otu444	21	588	0	0	0	0	0	0	0	0	0	0	0	0	0	0	0	0
otu445	25	43	88	0	0	0	0	0	250	0	0	0	0	0	0	0	2	0
otu446	0	0	0	0	1	0	24	14	34	23	0	0	6	373	83	0	0	0
otu447	0	2	25	0	0	49	234	40	130	68	41	26	17	0	219	0	1	2
otu448	0	0	0	0	0	0	39	117	18	1	0	0	2	171	2	0	0	0
otu449	0	0	0	0	0	0	810	42	0	1	0	15	0	0	0	0	0	0
otu450	0	0	0	0	0	0	0	0	323	0	1	0	0	0	0	0	0	0
otu451	210	190	178	0	0	0	0	0	0	0	0	0	0	0	0	0	0	0
otu452	0	0	0	38	0	0	63	166	42	134	24	0	116	0	56	0	2	8
otu453	0	0	0	18	260	0	0	0	0	39	0	0	0	144	0	0	0	0
otu454	0	0	7	0	0	1	47	104	62	0	112	82	0	0	0	0	0	0
otu455	2	1	17	0	0	0	7	58	204	250	46	61	36	0	0	1	0	0
otu456	10	18	17	0	0	0	0	0	0	0	0	0	3	0	3	0	0	0
otu457	4	14	9	0	0	0	0	0	0	0	0	0	0	0	7	0	0	0
otu458	0	3	0	0	0	0	0	0	0	0	0	274	0	0	0	0	0	0
otu459	37	107	39	0	41	0	8	0	1	0	0	0	18	261	18	0	0	0
otu461	233	41	62	0	0	56	0	13	9	64	0	0	0	0	27	0	0	0
otu462	0	0	0	0	0	0	0	0	0	0	0	0	481	0	0	0	0	0
otu463	0	0	0	0	0	0	0	0	0	333	0	0	0	0	0	0	0	0
otu464	0	0	0	0	0	0	15	17	2	2	0	0	0	498	18	0	1	0
otu465	0	0	1	0	0	0	14	0	34	411	1	0	1	31	2	0	0	0
otu466	0	0	0	0	0	0	4	50	36	181	72	0	0	0	0	0	0	0
otu467	0	0	10	2	0	0	1	0	0	0	0	0	0	450	0	0	0	0
otu468	0	0	0	322	96	0	0	0	0	0	0	0	0	0	0	0	0	0
otu469	0	0	0	0	0	0	0	11	2	10	1	0	0	0	4	0	0	0
otu470	0	0	2	0	0	120	14	15	82	127	1	43	0	0	0	0	0	0
otu471	0	0	0	0	0	0	19	11	15	442	0	91	0	0	0	0	0	0
otu472	4	6	2	0	0	0	0	0	0	0	0	0	1	14	3	0	0	0
otu473	2	567	0	0	0	0	0	0	0	0	0	0	0	0	0	0	0	0
otu474	16	56	714	0	0	0	0	0	0	0	0	0	0	6	0	0	0	0
otu475	0	0	0	0	0	0	0	328	0	0	0	0	0	0	0	0	0	0
otu476	0	0	0	0	0	0	0	0	0	240	0	0	0	0	0	0	0	0
otu478	0	0	0	0	0	0	0	5	0	0	0	0	0	0	592	0	0	0
otu479	0	8	93	0	109	0	52	0	0	0	0	0	0	103	0	0	0	0
otu480	0	0	0	0	0	0	0	0	0	0	0	306	0	0	0	0	0	0
otu481	1	0	0	2	335	0	0	0	0	0	0	0	0	0	0	0	0	0
otu482	0	0	1	0	0	9	0	0	3	2	9	0	0	0	5	0	0	0
otu483	1	0	1	0	0	0	0	0	2	217	0	0	0	0	0	0	0	0
otu484	0	0	0	0	0	0	1	46	0	421	0	13	0	1	0	0	0	0
otu485	1	0	0	0	0	91	0	0	0	0	0	348	22	0	0	0	0	0
otu486	0	0	0	0	0	0	0	0	0	0	0	0	85	50	306	0	0	1
otu487	0	0	4	0	0	0	143	0	51	0	23	60	0	0	44	0	0	0
otu488	0	0	0	0	0	0	0	0	0	0	0	0	405	2	0	0	0	0
otu489	0	0	0	0	0	0	1	14	7	7	0	4	6	0	3	0	0	0
otu490	4	5	6	0	7	0	3	5	8	0	5	9	7	2	5	3	1	6
otu491	0	0	0	10	0	0	1	1	0	1	0	0	18	301	101	0	0	0
otu492	0	0	0	0	0	0	3	8	20	24	391	9	6	0	1	0	0	0
otu493	11	4	1	0	0	0	9	119	185	58	0	0	0	58	47	11	2	0
otu494	14	17	70	0	0	0	38	0	0	1	0	0	13	371	0	0	0	0
otu495	0	0	0	0	0	0	0	0	40	434	0	0	0	0	0	0	0	0
otu496	0	0	0	6	0	80	0	0	21	32	11	141	0	0	0	0	0	0
otu497	0	0	0	24	0	328	0	0	0	0	37	14	0	0	0	0	0	0
otu498	0	0	0	0	0	0	0	0	0	0	0	79	0	0	0	0	0	0
otu499	10	103	257	0	9	0	47	0	13	0	0	0	111	42	0	0	0	1
otu500	1	0	0	0	0	0	0	0	0	5	0	0	88	54	238	0	0	0
otu501	0	0	3	0	0	0	0	21	18	62	0	126	0	0	0	0	0	0
otu502	12	11	327	0	25	0	11	0	17	0	0	0	0	17	0	0	2	5
otu503	2	0	0	120	0	355	3	10	30	1	17	0	54	2	0	0	0	0
otu504	3	0	0	0	207	126	25	0	0	0	0	0	0	0	0	0	0	0
otu505	2	55	0	0	0	0	0	0	0	0	0	0	0	0	0	0	0	0
otu506	0	0	0	0	491	0	15	0	0	0	0	0	0	0	0	0	0	0
otu507	0	0	0	0	0	0	0	0	0	301	0	0	0	0	0	0	0	0
otu508	0	0	0	0	0	0	13	0	0	244	129	0	0	4	0	0	0	0
otu509	8	0	0	0	0	0	43	335	33	0	0	0	0	55	11	0	0	0
otu510	0	0	0	0	0	0	0	0	390	0	0	0	0	0	0	0	0	0
otu511	1	0	0	0	0	0	34	223	33	0	0	0	0	1	45	0	0	0
otu512	0	0	0	3	0	0	0	0	16	0	0	0	114	5	298	0	0	0
otu513	0	0	0	0	0	0	0	274	0	0	0	0	0	0	0	0	0	0
otu514	2	4	1	0	90	26	0	0	1	0	0	0	171	41	14	0	0	0
otu515	0	0	0	0	0	0	72	0	32	227	136	22	0	0	0	0	0	0
otu516	0	0	1	0	0	0	0	0	0	0	309	0	0	0	0	0	0	0
otu517	26	1424	0	0	0	0	0	0	0	0	0	0	0	0	0	0	0	0
otu518	26	3	2	0	0	0	0	0	0	0	0	0	0	0	0	0	0	0
otu519	0	0	0	0	0	0	0	0	0	2	0	0	32	0	0	0	0	0
otu520	0	1	0	0	0	0	0	0	0	0	0	34	0	0	0	0	0	0
otu521	3	10	1	0	170	5	0	0	0	1	0	90	29	9	4	12	1	217
otu522	1	0	3	0	0	0	0	1	0	374	0	0	5	0	0	0	0	0
otu523	0	0	0	0	172	164	1	0	0	0	0	0	0	0	0	0	0	0
otu524	1	0	0	0	0	0	8	58	195	220	83	0	1	0	1	0	0	0
otu525	2	0	0	0	0	0	1	45	72	243	0	0	0	0	1	0	0	0
otu526	0	0	0	9	3	0	3	1	4	1	0	3	0	2	0	0	0	0
otu527	0	0	64	0	0	0	0	0	0	0	0	0	0	0	0	0	0	0
otu528	0	0	2	49	0	0	101	77	67	23	0	0	0	0	0	0	0	0
otu529	0	0	677	0	0	0	0	0	0	0	0	0	0	0	0	1	0	0
otu530	0	0	0	0	0	0	1	0	0	3	14	0	110	0	0	0	0	0
otu531	0	22	15	0	203	44	37	0	25	0	0	25	0	3	1	0	0	0
otu532	0	0	0	0	0	0	0	0	2	25	0	2	0	0	0	0	0	0
otu533	0	30	0	0	192	0	92	0	24	0	0	24	0	18	18	0	0	0
otu534	0	0	0	0	0	0	0	0	0	0	0	0	337	0	0	0	0	0
otu535	0	0	0	11	0	5	39	31	87	27	98	273	19	0	81	0	0	0
otu536	0	1	0	0	0	0	135	0	48	9	7	0	0	0	3	0	0	0
otu537	0	0	0	0	0	0	9	35	59	14	158	16	0	0	0	0	0	0
otu538	103	92	63	0	18	0	6	12	0	0	0	0	183	86	1	0	0	0
otu539	0	0	26	167	70	183	11	7	2	0	0	11	0	0	3	0	0	0
otu540	0	0	0	0	360	0	0	0	0	0	0	0	0	0	0	0	0	0
otu541	0	0	0	0	0	0	0	0	4	0	0	0	51	0	170	0	0	0
otu542	3	2	0	0	0	0	0	13	224	204	0	0	0	41	0	0	0	0
otu543	0	0	0	0	0	1	0	0	0	0	1	0	0	186	1	0	0	0
otu544	0	0	0	0	0	0	0	0	234	0	0	0	0	0	0	0	0	0
otu545	0	0	0	0	0	0	0	0	0	0	0	0	0	0	309	0	0	1
otu546	1	0	0	0	0	0	0	21	490	51	148	0	0	0	0	0	0	0
otu547	1	0	0	0	0	385	0	0	0	0	0	0	0	0	0	0	0	0
otu548	0	0	0	0	0	0	0	0	0	280	0	0	0	0	0	0	0	0
otu549	3	0	5	0	0	0	0	20	0	246	54	0	0	0	0	0	0	0
otu550	0	0	0	0	0	0	0	0	0	326	0	0	0	0	0	0	0	0
otu551	0	0	0	0	0	0	0	6	0	235	0	0	0	0	0	0	0	0
otu552	0	0	10	0	0	0	0	0	0	0	0	362	0	0	72	0	0	1
otu553	17	2	10	0	202	33	33	41	21	0	0	0	0	9	100	0	1	0
otu554	88	11	2	0	44	0	0	167	0	0	1	0	28	7	0	0	0	0
otu555	38	395	40	0	42	0	0	0	0	0	0	37	0	52	0	0	1	0
otu556	0	0	0	0	0	0	0	0	0	0	41	0	0	0	0	0	0	0
otu557	0	1	0	0	0	0	116	0	106	0	1	0	0	91	0	0	0	0
otu558	0	0	2	0	0	89	4	0	8	204	0	0	0	0	0	0	0	0
otu560	0	1	2	0	0	0	0	0	135	0	0	0	0	89	0	0	0	0
otu561	0	3	0	1	0	334	10	0	0	0	0	0	25	0	0	0	0	2
otu562	0	0	0	0	0	0	0	16	6	0	0	0	60	2	0	0	0	0
otu563	0	0	0	0	0	0	1	0	0	2	0	0	1	21	4	0	0	0
otu565	0	0	1	0	145	89	3	0	1	0	0	26	0	0	0	0	0	0
otu566	0	0	0	0	0	0	0	0	0	265	0	0	0	0	0	0	0	0
otu567	0	0	0	0	0	0	12	0	0	248	0	0	0	0	0	0	0	0
otu568	0	0	0	0	0	0	0	9	0	0	0	0	4	12	4	0	0	0
otu569	9	459	21	0	0	0	0	0	0	0	0	0	0	0	0	0	0	0
otu571	0	0	1	28	149	0	20	27	0	35	0	0	17	13	0	0	0	0
otu572	1	5	29	0	136	3	16	37	20	12	6	25	26	19	6	37	17	33
otu573	1	0	3	0	0	0	55	1	0	0	0	280	0	0	0	0	0	0
otu575	0	35	3	3	15	189	67	51	11	0	0	1	0	10	0	0	0	0
otu576	4	7	1	0	0	0	81	42	105	0	0	1	0	66	0	0	0	1
otu577	0	0	0	0	0	77	25	31	2	11	10	173	0	3	0	0	0	0
otu578	0	0	2	0	0	0	3	1	10	7	203	9	6	0	1	0	0	0
otu579	3	0	0	0	0	0	0	0	0	3	0	0	96	0	0	0	0	0
otu580	0	0	0	0	0	158	0	0	0	0	0	0	0	0	0	0	0	0
otu581	0	0	9	0	7	0	3	0	0	0	0	0	0	4	0	0	0	0
otu582	0	0	0	0	0	0	14	103	75	64	0	6	0	0	2	0	0	0
otu583	0	0	0	0	1	0	6	56	194	0	0	0	0	0	0	0	0	0
otu584	0	1	6	0	0	0	0	0	199	0	0	0	30	0	1	0	0	0
otu585	0	0	2	0	0	0	20	3	12	4	4	1	0	0	0	0	0	0
otu586	0	0	0	0	0	1	11	6	19	0	1	1	0	447	1	0	0	0
otu587	24	51	182	0	0	0	0	0	96	98	0	0	0	2	23	5	9	0
otu588	0	0	29	0	0	0	0	0	0	0	0	0	0	0	0	0	0	0
otu589	56	346	0	0	0	0	0	0	0	0	0	0	0	0	0	0	0	0
otu590	0	20	9	0	0	0	51	4	287	0	0	0	0	0	0	0	0	3
otu591	0	0	7	0	0	0	11	40	36	125	7	0	97	5	0	0	0	0
otu592	2	0	1	0	0	0	0	14	0	0	0	0	138	0	114	0	0	1
otu593	0	0	0	0	0	264	0	0	0	9	0	0	0	0	0	0	0	0
otu594	0	0	0	0	0	0	0	243	0	0	0	0	0	0	0	0	0	0
otu595	6	172	61	0	0	0	81	39	36	2	0	0	0	1	1	15	0	0
otu596	421	116	0	0	0	0	0	0	0	0	0	0	0	0	0	0	0	0
otu597	0	0	20	0	0	0	16	0	224	0	0	0	0	0	0	0	0	0
otu598	0	0	0	0	0	258	0	0	0	0	0	0	0	0	0	0	0	0
otu599	0	0	5	0	0	0	0	42	1	208	0	0	0	0	0	0	0	0
otu600	0	0	0	0	0	0	1	7	8	5	5	0	0	0	0	0	0	0
otu602	0	0	0	0	0	125	0	0	0	14	0	195	0	0	0	0	0	0
otu603	6	148	0	0	0	0	0	0	0	0	0	0	0	0	0	0	0	0
otu604	0	0	3	0	0	0	46	3	23	3	46	265	41	1	29	0	0	0
otu605	0	0	0	384	0	2	0	0	3	2	7	2	2	0	0	0	0	0
otu606	0	0	0	0	0	98	0	0	0	0	0	0	0	0	0	0	0	0
otu607	0	4	0	0	0	50	14	0	27	0	82	0	0	0	0	0	0	0
otu608	2	0	0	27	0	505	0	0	0	0	0	0	0	0	0	0	0	0
otu609	0	0	0	0	0	0	0	0	0	0	0	0	0	0	0	27	0	596
otu610	1	2	2	0	1	0	1	1	9	0	0	0	45	34	32	0	2	0
otu611	0	0	0	0	230	0	0	0	0	0	0	0	0	0	0	0	0	0
otu612	0	0	0	0	0	309	4	0	0	0	0	0	0	0	0	0	0	0
otu613	98	613	54	0	0	0	0	0	0	0	0	0	0	0	0	0	0	0
otu614	0	0	0	0	11	0	5	0	4	0	1	0	6	0	12	0	0	0
otu615	55	1	16	0	0	310	4	0	0	0	0	0	0	0	0	0	0	0
otu616	403	179	7	0	0	0	0	0	0	0	0	0	3	0	0	0	0	0
otu617	0	1	10	0	0	4	2	52	24	24	0	156	0	0	0	0	0	0
otu618	1	38	0	0	0	0	0	0	0	0	0	0	0	0	0	0	0	0
otu619	2	10	34	0	0	0	0	0	8	250	21	0	0	7	0	0	0	0
otu620	2	1	0	0	13	146	0	0	0	0	0	0	0	0	0	0	0	0
otu621	0	0	0	0	0	0	0	226	0	0	0	0	0	0	0	0	0	0
otu622	0	0	0	0	0	0	0	0	0	218	0	0	0	0	0	0	0	0
otu623	0	0	0	0	0	0	0	0	0	0	0	267	0	0	0	0	0	0
otu624	0	0	0	0	0	160	0	0	0	0	0	0	0	0	0	0	0	0
otu625	0	0	0	0	0	0	0	0	0	71	0	323	0	0	0	0	0	0
otu626	0	0	0	0	11	241	0	0	0	0	0	0	0	0	0	0	0	0
otu627	0	0	0	0	281	0	0	0	0	0	0	0	1	2	0	0	0	0
otu628	0	0	2	0	0	0	0	169	0	7	9	0	0	0	167	0	0	0
otu629	0	0	2	1	0	0	12	17	2	16	1	0	26	0	5	0	0	0
otu630	1	0	0	0	0	0	0	0	6	0	0	0	232	0	0	0	0	0
otu631	0	0	0	0	0	53	0	0	0	0	0	0	0	0	0	0	0	0
otu632	0	0	0	0	285	0	0	0	0	0	0	0	0	0	0	0	0	0
otu633	2	2	3	0	0	0	0	72	52	72	0	0	76	0	0	0	0	0
otu634	0	3	0	0	5	0	8	89	204	0	0	0	0	0	0	0	0	0
otu635	7	16	1	0	0	0	0	0	0	0	0	0	0	0	0	0	0	0
otu636	632	0	0	0	0	0	0	0	0	0	0	0	0	0	0	0	0	0
otu637	0	0	3	0	0	0	256	0	10	14	0	0	0	2	0	0	0	0
otu638	0	0	0	0	0	0	0	14	0	0	0	0	0	0	9	0	0	0
otu639	0	12	0	0	186	0	7	0	52	0	0	8	0	16	0	0	0	0
otu641	2	3	2	0	0	275	9	0	7	0	1	0	0	1	0	0	0	0
otu642	0	0	4	0	0	0	0	24	29	0	53	61	0	0	0	0	0	0
otu643	0	106	8	0	219	0	0	0	9	0	0	0	0	0	1	0	0	0
otu644	0	0	1	0	0	40	1	5	60	96	0	11	64	1	0	0	0	0
otu645	0	0	0	0	0	0	0	0	0	313	0	0	0	0	0	0	0	0
otu646	0	0	0	0	0	0	0	0	0	0	0	0	283	0	37	0	0	0
otu647	0	0	0	0	0	133	0	0	5	0	0	99	0	0	0	0	0	0
otu648	0	0	23	0	0	0	0	0	0	0	0	0	0	0	0	0	0	0
otu649	0	12	33	0	0	0	2	131	0	4	0	0	0	73	0	0	0	0
otu650	218	428	168	0	0	0	0	0	0	0	0	0	0	0	0	0	0	0
otu651	0	0	0	0	0	0	0	0	0	0	0	0	0	0	29	0	0	0
otu652	0	0	0	10	0	0	0	0	6	0	240	0	0	13	0	0	0	0
otu653	0	0	0	0	0	0	5	9	280	17	0	0	44	0	0	0	0	0
otu654	12	18	15	0	89	0	12	0	0	0	1	1	41	81	65	0	0	2
otu655	0	0	0	0	0	0	14	0	0	0	0	0	1	148	0	0	0	0
otu656	0	0	0	0	0	0	0	0	0	1	0	0	0	28	364	0	0	4
otu657	0	0	1	0	0	0	0	0	0	225	0	0	0	0	0	0	0	0
otu658	8	2	0	0	0	0	13	9	5	0	0	0	12	0	213	0	0	0
otu660	0	0	0	0	17	4	1	0	4	0	0	0	0	0	0	0	0	0
otu661	0	0	0	0	0	21	0	0	0	1	0	30	0	0	0	0	0	0
otu662	1	0	0	0	0	0	1	15	618	27	43	0	0	0	0	0	0	0
otu663	0	0	3	171	0	0	0	4	0	0	1	0	0	0	0	0	0	0
otu664	0	0	0	0	0	1	0	0	1	1	0	0	0	284	1	0	0	0
otu665	0	0	0	187	1	0	0	0	0	0	0	0	0	0	0	0	0	0
otu666	0	0	0	0	0	0	0	1	8	106	159	29	0	2	0	0	0	0
otu667	0	0	0	0	0	0	0	0	0	40	0	0	0	0	0	0	0	0
otu668	2	408	0	0	0	0	2	0	0	0	0	0	0	0	0	0	0	0
otu669	0	0	0	0	0	0	178	0	0	0	0	19	0	64	23	0	0	0
otu670	0	0	0	0	0	0	0	6	0	0	185	26	0	0	0	0	0	0
otu671	3	5	0	21	63	49	6	9	5	0	0	4	15	2	60	0	0	0
otu672	0	0	0	272	0	2	0	0	2	1	4	0	0	0	1	0	0	0
otu673	0	0	0	0	0	0	210	0	0	0	1	0	0	0	0	0	0	0
otu674	0	0	17	0	0	0	42	56	116	29	0	0	29	0	110	0	0	0
otu675	0	0	0	0	0	0	5	0	3	1	0	0	0	80	0	0	0	0
otu676	0	0	1	0	0	0	0	135	165	0	0	0	236	0	0	2	0	0
otu677	0	0	0	57	0	10	0	0	0	0	0	92	0	0	0	0	0	1
otu678	0	0	1	264	1	0	0	0	0	0	0	170	7	83	1	0	0	0
otu679	2	0	0	0	18	179	14	0	0	0	0	0	0	20	0	0	2	0
otu680	0	1	215	0	0	0	9	0	0	0	0	0	19	0	35	0	0	0
otu681	0	0	3	0	0	0	23	31	248	0	0	0	0	5	0	0	0	0
otu682	0	0	0	0	0	0	0	0	0	20	0	91	0	0	0	0	0	0
otu683	0	20	0	0	0	0	0	0	0	0	0	0	0	0	0	0	0	0
otu684	0	0	0	0	192	0	0	0	1	0	0	0	0	0	0	0	0	0
otu685	0	0	0	0	0	0	0	0	219	0	0	0	0	0	0	0	0	0
otu686	0	0	360	0	0	0	0	0	0	0	0	0	0	0	0	0	0	0
otu687	2	2	6	0	0	0	0	0	84	101	0	0	0	8	1	0	0	0
otu688	2	0	5	0	0	214	0	0	0	0	112	56	0	18	0	0	0	0
otu689	44	394	3	0	0	0	0	0	0	0	0	0	0	0	0	0	0	0
otu690	0	869	1	0	0	0	0	0	0	0	0	0	0	0	0	0	0	0
otu691	6	1	4	0	0	0	0	20	145	0	0	0	0	0	0	0	0	0
otu692	0	0	0	0	0	325	0	0	0	0	2	0	0	0	1	0	0	0
otu693	0	0	0	0	0	0	18	59	5	0	194	0	0	8	0	0	0	0
otu694	0	0	0	0	0	109	5	0	21	0	30	27	0	0	18	0	0	0
otu695	0	0	0	0	0	0	0	0	1	3	242	3	0	0	0	0	0	0
otu696	4	3	0	12	26	0	0	67	22	19	0	37	30	0	0	0	0	0
otu697	0	41	7	0	0	0	0	0	0	0	0	0	0	0	0	0	0	0
otu698	0	0	0	0	0	0	0	0	0	333	0	0	0	0	0	0	0	0
otu699	4	0	2	0	55	0	67	0	0	0	0	0	91	3	44	1	0	0
otu700	0	0	0	0	0	0	0	145	0	0	0	0	0	0	0	0	0	0
otu701	407	77	0	0	0	0	0	0	0	0	0	0	0	0	0	0	0	0
otu702	0	0	0	0	0	0	0	17	331	0	0	0	0	0	1	0	0	0
otu703	0	0	0	0	162	0	23	2	22	0	0	0	1	2	0	0	0	0
otu704	7	158	1	0	52	0	15	0	1	0	0	0	0	8	16	0	0	0
otu705	15	387	0	0	0	0	0	0	0	0	0	0	0	0	0	0	0	0
otu706	0	2	5	0	0	63	5	0	30	157	0	0	0	8	0	0	0	0
otu707	0	28	0	0	0	0	0	0	0	0	0	0	0	0	0	0	0	0
otu708	1	24	0	0	0	0	0	0	0	0	0	0	0	0	0	0	0	0
otu709	0	0	0	0	10	1	2	0	1	0	0	4	0	0	1	0	0	0
otu710	8	46	0	0	0	0	0	0	0	0	0	0	0	0	0	0	0	0
otu711	0	0	0	0	4	0	0	9	4	0	0	0	0	127	80	0	0	0
otu712	0	5	0	0	0	0	0	0	0	0	0	0	244	0	257	0	0	0
otu713	0	0	0	0	0	0	6	11	4	0	10	0	0	1	0	0	0	0
otu714	0	0	0	0	0	0	22	36	5	8	0	0	0	0	0	0	0	0
otu715	0	7	12	0	172	48	20	0	16	0	0	0	0	4	0	0	0	0
otu716	0	0	3	0	0	5	12	30	16	33	17	74	0	0	0	0	0	0
otu717	0	0	0	0	0	292	0	0	0	0	0	0	0	0	0	0	0	0
otu718	273	84	47	0	0	0	0	0	0	0	0	0	0	0	0	0	0	0
otu719	0	0	0	0	0	252	0	0	0	0	0	0	0	0	0	0	0	0
otu720	1	0	2	0	0	0	30	0	18	141	60	0	0	2	0	0	0	0
otu721	0	0	0	0	374	0	0	0	0	0	0	0	0	0	0	0	0	0
otu722	0	0	1122	0	0	0	0	0	17	0	0	0	0	0	0	9	0	2
otu723	0	0	0	0	0	0	5	10	8	241	13	4	0	0	0	0	0	0
otu724	21	2	0	0	0	0	0	64	0	0	0	0	84	52	0	1	1	0
otu725	0	4	2	0	0	0	17	16	37	95	16	0	0	6	0	0	0	0
otu726	0	0	0	0	0	0	3	1	7	0	0	0	3	0	12	0	0	0
otu727	0	0	0	0	0	0	0	111	25	0	24	0	0	0	0	0	0	0
otu728	0	0	0	0	97	180	0	34	0	0	0	2	8	0	0	0	0	0
otu729	0	0	3	13	7	10	2	0	1	1	0	2	0	0	0	0	0	0
otu730	0	0	0	0	0	0	113	0	24	0	0	0	0	0	0	0	0	0
otu731	5	79	0	0	0	0	0	0	0	0	0	0	0	0	0	0	0	0
otu732	0	4	3	0	0	0	0	193	5	0	0	0	0	0	0	0	0	0
otu733	0	0	0	0	0	151	0	0	0	0	0	0	0	0	0	0	0	0
otu734	0	0	0	0	0	0	0	0	0	14	22	0	21	0	26	0	0	0
otu735	4	0	9	0	0	0	0	0	0	5	0	0	78	41	76	0	0	0
otu736	89	14	0	0	0	0	0	0	0	0	0	0	0	0	0	0	0	0
otu737	0	0	0	0	0	0	0	7	14	155	23	53	0	7	2	0	0	0
otu738	2	2	22	0	0	0	0	0	0	0	0	0	0	0	0	0	0	0
otu739	558	319	0	3	0	0	0	0	0	0	0	0	0	2	0	0	0	0
otu740	0	0	0	0	0	175	0	0	0	0	0	0	0	0	0	0	0	0
otu741	0	0	0	109	19	0	6	0	0	21	0	80	0	4	8	0	0	0
otu742	0	1	2	0	0	3	0	12	2	7	0	44	0	0	0	0	0	0
otu745	0	0	0	0	45	0	18	0	0	1	40	0	0	0	0	0	0	0
otu746	21	2	0	0	0	0	0	0	0	0	0	0	0	0	0	0	0	0
otu747	0	0	0	0	0	0	0	0	27	0	0	0	2	0	0	0	0	0
otu748	0	0	0	0	0	0	166	0	0	0	0	0	0	0	1	0	0	0
otu749	2	1	14	0	0	0	0	0	0	0	0	0	0	0	0	0	0	0
otu750	0	0	0	158	0	0	6	0	0	23	0	0	0	2	0	0	0	0
otu751	3	0	10	0	0	0	11	40	44	260	61	16	33	0	0	0	5	2
otu752	1	0	0	1	1	0	33	1	0	0	0	0	20	240	12	0	0	0
otu753	1	11	10	0	13	1	1	1	0	1	0	0	3	5	0	0	0	1
otu754	7	1	0	0	0	0	0	0	0	0	0	0	4	6	0	0	0	0
otu755	0	0	0	0	0	0	0	0	0	203	0	0	0	0	0	0	0	0
otu756	0	0	0	0	0	0	0	0	0	197	0	0	0	0	0	0	0	0
otu757	0	0	0	0	1	0	0	2	0	0	0	0	0	37	0	0	0	0
otu758	1	0	1	0	0	0	0	2	25	183	0	0	0	9	0	0	0	0
otu759	12	446	16	0	0	0	0	0	0	0	0	0	0	0	0	0	0	0
otu760	0	0	0	282	2	1	0	0	1	2	1	0	1	0	0	0	0	0
otu761	0	0	0	0	0	0	10	0	4	0	0	5	0	0	2	0	0	0
otu762	2	32	9	0	180	53	0	0	0	0	0	0	0	3	0	0	0	0
otu763	16	2	60	1	0	0	0	19	0	0	0	0	20	186	41	0	0	0
otu764	0	0	0	0	0	0	0	0	0	0	0	0	0	0	113	0	0	0
otu765	0	0	102	0	0	0	0	0	0	0	0	0	0	0	0	0	0	0
otu766	5	0	0	12	28	41	12	3	3	0	0	36	0	6	18	0	0	2
otu767	3	3	19	0	0	0	0	28	28	101	0	0	73	0	0	0	0	0
otu768	287	0	0	0	0	0	0	0	0	0	0	0	0	0	0	0	0	0
otu769	10	31	23	0	77	9	17	29	23	5	4	48	27	14	11	0	1	0
otu770	2	7	6	0	0	0	7	22	0	10	0	0	0	22	126	1	0	0
otu771	0	34	1	0	0	0	0	0	0	0	0	0	0	0	0	0	0	0
otu772	1	15	0	0	0	0	0	0	0	0	0	0	0	0	0	0	0	0
otu773	0	0	0	0	0	0	0	0	0	0	0	0	200	0	0	0	0	0
otu774	0	0	0	0	0	0	0	198	0	0	0	0	0	0	0	0	0	0
otu775	1	0	2	0	0	0	0	0	25	71	131	0	0	1	0	2	0	0
otu776	0	34	1	0	146	0	0	0	0	0	0	0	1	0	0	0	0	0
otu777	223	198	2	0	0	0	0	0	0	0	0	0	0	0	0	0	0	0
otu778	0	0	6	0	1	5	44	34	51	9	17	89	36	0	38	0	0	0
otu779	0	0	0	0	0	0	39	2	31	2	110	109	157	0	7	0	0	0
otu780	0	440	0	0	0	0	0	0	0	0	0	0	0	0	0	0	0	0
otu781	0	0	0	34	0	144	0	0	0	0	0	0	0	0	0	0	0	0
otu783	0	0	0	0	0	0	4	29	88	3	12	2	41	0	3	0	0	0
otu784	0	0	0	0	0	0	0	0	0	0	0	128	0	0	0	0	0	0
otu786	0	0	0	0	0	0	0	0	0	145	0	0	0	0	0	0	0	0
otu787	0	1	0	0	0	0	129	36	0	0	0	0	0	0	0	0	0	0
otu788	0	0	0	0	0	0	0	0	0	0	0	0	0	0	166	0	0	0
otu789	0	0	0	0	0	0	1	0	1	34	4	1	0	0	0	0	0	0
otu790	3	0	0	0	0	0	5	14	8	109	51	0	0	0	0	0	0	0
otu791	0	0	21	0	105	0	16	11	0	26	0	15	31	0	0	11	25	21
otu792	0	0	0	0	0	0	0	0	29	153	85	0	0	0	0	0	0	0
otu793	0	0	0	0	0	0	0	0	1	0	0	0	9	6	11	0	0	0
otu794	0	0	0	168	0	0	0	1	0	0	0	0	0	0	0	0	0	0
otu795	0	174	0	0	0	0	0	0	0	0	0	0	0	0	0	0	0	0
otu796	0	0	5	0	0	0	0	0	0	15	0	219	0	0	0	0	0	0
otu797	0	0	0	0	0	177	0	0	0	0	0	2	0	0	0	0	0	0
otu798	3	346	0	0	0	0	0	0	0	0	0	0	0	0	0	0	0	0
otu799	0	0	40	0	0	0	0	0	0	0	0	0	0	0	0	0	0	0
otu800	0	0	0	0	1	0	0	0	0	0	0	0	0	154	0	0	0	0
otu801	1	1	5	0	42	0	0	0	0	4	0	13	74	44	0	0	0	0
otu802	0	18	0	0	0	0	0	0	0	0	0	0	0	0	0	0	0	0
otu803	7	1	0	0	0	0	0	0	0	0	0	0	300	0	0	0	0	0
otu805	0	0	0	0	0	180	0	0	0	9	0	0	0	0	0	0	0	0
otu806	0	0	0	0	0	0	32	77	24	0	0	0	0	79	0	0	0	0
otu807	0	3	9	0	0	0	0	0	0	80	79	0	0	0	0	0	4	0
otu808	0	0	0	0	0	138	0	0	0	0	0	35	0	0	0	0	0	0
otu809	0	0	0	0	0	0	0	228	0	0	0	0	0	0	0	0	0	0
otu810	3	3	3	0	0	0	0	0	0	29	0	0	139	0	0	0	0	0
otu811	0	0	0	4	17	0	0	14	9	52	44	0	0	6	0	0	0	0
otu812	0	2	12	0	0	0	16	44	28	0	0	0	0	0	0	0	0	0
otu813	41	42	0	0	0	0	0	0	0	0	0	0	0	0	0	0	0	0
otu814	0	0	0	0	0	0	0	0	0	234	0	0	0	0	0	0	0	0
otu815	0	0	0	0	0	0	10	1	124	36	0	0	0	0	0	0	0	0
otu816	0	0	0	146	0	0	0	0	0	0	0	0	1	0	0	0	0	0
otu817	0	0	0	0	0	0	3	0	0	0	0	3	0	0	9	0	0	0
otu818	2	15	0	0	0	0	0	0	0	0	0	0	0	0	0	0	0	0
otu819	0	3	9	0	57	0	9	12	11	2	0	18	21	6	1	2	0	7
otu820	0	0	0	237	0	0	0	0	0	10	18	1	1	0	0	0	0	0
otu822	0	0	0	0	0	0	0	0	0	0	187	0	0	0	1	0	0	0
otu823	40	6	0	0	0	0	0	0	0	0	0	0	0	1	0	0	0	0
otu824	0	75	0	0	1	0	1	0	0	0	0	0	0	164	0	0	0	0
otu825	0	8	10	0	0	0	0	0	5	3	0	0	0	0	2	3	2	0
otu826	0	0	0	0	0	0	0	1	1	10	22	3	0	0	0	0	0	0
otu827	0	0	0	0	184	0	0	0	10	0	0	4	0	0	0	0	0	0
otu828	0	0	0	0	0	0	1	0	1	1	8	0	1	0	1	0	0	0
otu829	0	0	0	0	97	72	0	0	0	1	0	0	0	6	0	0	0	0
otu830	0	0	0	0	0	0	5	0	2	0	15	0	0	0	0	0	0	0
otu831	0	0	0	0	0	0	0	28	0	0	0	0	0	145	191	0	0	0
otu832	2	31	0	0	0	0	0	0	0	0	0	0	0	0	0	0	0	0
otu833	0	0	1	0	0	0	5	18	18	39	9	83	27	17	46	0	0	0
otu834	0	0	1	0	0	0	6	73	173	6	28	3	75	0	28	0	0	0
otu835	0	0	0	18	156	0	0	0	0	0	0	0	0	0	0	0	0	0
otu836	0	25	0	0	0	0	0	0	0	0	0	0	0	0	0	0	0	0
otu837	23	18	9	0	68	7	19	15	23	2	1	48	35	4	10	0	0	4
otu838	1	17	0	0	0	0	0	0	0	0	0	0	0	0	0	0	0	0
otu839	0	0	0	0	29	0	8	0	0	0	0	111	0	47	0	0	0	0
otu840	0	0	0	0	0	0	0	0	0	18	196	0	0	0	0	0	0	0
otu841	0	0	0	0	0	0	0	0	0	17	0	0	0	0	0	0	0	0
otu842	0	0	0	0	0	0	0	0	0	0	0	0	0	0	176	0	0	0
otu843	0	0	0	0	0	0	11	49	303	55	137	0	0	0	0	0	0	0
otu844	0	0	0	0	0	0	0	0	138	0	0	0	0	0	0	0	0	0
otu845	0	0	0	0	0	0	0	0	0	125	0	0	0	0	0	0	0	0
otu846	2	0	0	0	0	0	0	0	0	130	0	0	0	0	0	0	0	0
otu847	0	0	0	0	0	0	0	0	0	132	0	0	0	17	0	0	0	0
otu848	53	18	47	0	22	0	0	6	2	0	0	4	4	6	0	0	0	0
otu849	0	0	0	0	0	0	0	0	178	0	0	0	0	0	0	0	0	0
otu850	0	1	0	0	0	0	19	5	18	18	0	64	20	0	30	0	0	4
otu851	0	0	0	0	20	0	0	9	28	0	19	0	0	27	0	0	0	0
otu852	0	0	0	0	0	0	0	11	2	1	0	3	3	0	1	0	0	0
otu853	0	0	0	0	0	0	0	0	0	31	0	0	0	3	0	0	0	0
otu854	0	0	0	0	0	0	2	2	0	96	0	44	0	0	0	0	0	0
otu855	112	244	0	0	0	0	0	0	0	0	0	0	0	0	1	0	0	0
otu856	2	12	1	0	0	0	0	0	200	0	0	0	0	1	0	0	0	0
otu857	0	20	0	0	0	0	0	0	0	0	0	0	0	0	0	0	0	0
otu858	0	0	0	49	0	0	5	14	0	3	63	4	6	0	2	0	0	0
otu859	0	0	0	0	0	1	0	0	0	143	0	0	0	0	0	0	0	0
otu860	164	147	0	0	0	0	0	0	0	0	0	0	0	0	0	0	0	0
otu861	0	63	103	0	0	0	39	0	0	0	0	0	0	0	0	0	0	0
otu862	0	0	10	0	6	194	0	0	55	0	0	0	0	4	0	0	0	0
otu863	0	0	14	0	0	0	0	80	173	0	0	0	0	8	0	0	0	0
otu864	0	0	1	0	0	0	0	0	0	11	3	0	0	1	0	0	0	0
otu865	0	0	0	0	0	0	0	0	0	0	0	0	173	4	25	0	0	0
otu866	1	0	0	41	0	0	0	23	5	42	0	0	0	9	0	0	1	0
otu867	0	0	0	0	0	0	0	0	0	0	18	11	0	2	0	0	0	0
otu868	0	0	0	163	0	0	0	0	0	0	0	0	0	0	0	0	0	0
otu869	0	0	0	0	0	0	0	0	0	33	144	7	0	0	0	0	0	0
otu870	0	0	0	0	0	0	0	0	206	0	0	0	0	0	0	0	0	0
otu871	0	0	272	0	0	0	0	0	0	0	0	0	0	0	0	0	0	0
otu872	163	7	4	0	0	0	5	0	0	0	0	0	0	61	1	0	0	2
otu873	0	1	0	0	0	87	34	44	0	0	0	0	0	0	0	0	0	0
otu874	117	65	100	0	0	0	9	0	0	0	0	13	6	67	0	0	12	0
otu875	0	0	0	0	0	0	0	0	0	0	0	163	0	0	0	0	0	0
otu876	1	1	0	0	1	120	0	0	0	0	0	0	0	4	0	0	0	0
otu877	39	42	52	0	0	0	1	2	0	3	0	2	64	0	37	3	1	1
otu878	0	0	0	0	130	0	0	0	0	0	0	12	0	0	0	0	0	0
otu879	18	0	0	0	0	0	0	0	0	0	0	0	0	0	0	0	0	0
otu880	1	0	2	0	0	0	0	0	11	5	0	0	31	53	200	0	0	0
otu881	0	0	286	0	0	0	0	0	0	0	0	0	0	0	0	0	0	0
otu882	0	4	1	0	0	0	0	125	0	0	0	0	0	0	0	0	0	0
otu883	0	341	0	0	0	0	0	0	0	0	0	0	0	0	0	0	0	0
otu884	0	0	5	1	0	0	20	109	0	0	0	0	0	0	0	0	0	3
otu885	0	0	0	0	0	0	0	0	161	0	0	0	0	0	0	0	0	0
otu886	0	0	4	0	0	231	0	0	0	0	0	0	0	0	0	0	0	0
otu887	0	0	24	0	0	0	0	0	0	0	0	0	0	0	0	0	0	0
otu888	2	324	4	69	0	0	0	0	0	0	0	0	0	0	0	0	0	0
otu889	0	0	0	7	0	0	7	7	6	0	0	0	0	0	0	0	0	0
otu890	51	1	139	0	0	0	0	0	0	0	0	0	0	18	0	0	0	0
otu891	0	0	0	0	0	0	9	19	3	6	0	0	0	0	0	0	0	0
otu892	0	0	0	0	0	0	0	0	0	0	0	0	257	0	0	0	0	0
otu893	0	0	0	0	0	0	0	178	0	0	0	0	0	0	0	0	0	0
otu894	0	0	0	0	0	68	0	4	0	0	0	0	0	0	0	0	0	0
otu895	0	0	0	0	0	0	0	0	0	7	112	103	0	0	1	0	0	0
otu896	0	0	0	0	1	23	0	0	0	0	0	0	0	0	0	0	0	0
otu897	0	15	0	0	0	0	0	0	0	0	0	0	0	0	0	0	0	0
otu898	0	0	0	1	0	0	0	28	0	0	78	0	0	58	0	0	0	0
otu899	0	0	0	0	40	5	0	0	0	0	0	0	0	1	0	0	0	0
otu900	0	0	0	95	0	0	0	0	0	0	0	0	0	0	0	0	0	0
otu901	0	0	1	0	0	0	156	0	2	0	0	0	28	0	17	0	0	0
otu902	1	15	0	0	0	0	0	0	0	0	0	0	0	0	0	0	0	0
otu903	0	0	0	0	0	0	0	21	0	0	0	0	0	0	0	0	0	0
otu904	22	0	0	0	0	0	0	0	0	0	0	0	0	0	0	0	0	0
otu905	0	2	19	0	0	0	5	39	0	99	33	0	16	0	8	0	0	0
otu906	0	0	0	0	0	0	0	0	99	0	0	0	0	0	0	0	0	0
otu907	0	0	0	0	0	0	0	0	3	123	0	0	0	0	0	0	0	0
otu908	0	0	0	0	28	0	0	0	0	0	0	6	3	0	0	0	0	1
otu909	0	0	0	0	0	0	0	0	0	58	0	0	0	0	0	0	0	0
otu910	2	1	2	0	1	4	3	1	2	0	0	0	0	0	0	0	0	0
otu911	0	0	2	0	8	1	0	2	2	0	0	3	1	0	1	0	0	1
otu912	0	0	0	0	0	0	0	165	0	0	0	0	0	0	0	0	0	0
otu913	189	131	2	0	0	0	0	0	0	0	0	0	0	0	0	0	0	0
otu914	0	0	0	0	0	0	0	0	0	174	0	0	0	0	0	0	0	0
otu915	0	0	0	0	0	0	1	0	0	0	0	0	0	196	0	0	0	0
otu916	0	0	0	0	0	0	0	0	0	1	0	0	0	137	0	0	0	0
otu917	3	0	0	0	0	0	0	0	0	64	0	0	6	12	0	48	3	510
otu918	0	0	0	0	0	154	0	0	0	25	44	4	0	0	0	0	0	0
otu919	0	0	0	0	0	0	0	0	0	2	19	0	0	0	0	0	0	0
otu920	13	3	0	0	0	0	0	0	0	0	0	0	0	0	0	0	0	0
otu921	203	53	0	0	0	0	0	0	0	0	0	0	0	0	0	0	0	0
otu922	0	0	0	0	0	154	0	0	0	0	0	0	0	0	0	0	0	0
otu923	0	0	2	0	0	0	39	15	71	36	59	0	0	0	0	0	0	0
otu924	0	13	7	0	75	0	2	12	5	6	1	4	11	29	6	6	3	2
otu925	0	0	1	0	0	0	11	0	14	85	0	73	3	5	27	0	0	0
otu926	0	0	0	14	41	49	0	0	0	0	0	1	0	0	0	0	0	0
otu927	33	0	4	0	0	0	10	1	177	34	9	0	7	0	0	0	0	0
otu928	0	2	7	0	37	0	6	24	8	4	0	10	9	11	2	3	4	9
otu929	0	0	8	34	0	0	32	7	6	97	117	14	0	14	24	0	0	0
otu930	16	277	0	0	0	0	0	0	0	0	0	0	0	0	0	0	0	0
otu931	0	0	0	0	295	0	4	1	0	0	0	0	5	0	0	0	0	0
otu932	0	0	0	0	0	0	2	0	0	14	0	0	133	5	0	0	0	0
otu933	0	0	0	0	12	9	0	3	0	0	0	0	0	0	0	0	0	0
otu935	0	0	0	0	0	22	0	0	2	0	0	9	0	0	0	0	0	0
otu936	3	0	1	0	0	0	0	0	0	0	0	0	232	4	6	0	0	0
otu938	0	0	0	0	0	0	6	2	14	29	250	33	2	4	0	0	0	0
otu939	0	0	0	0	0	0	42	128	0	0	0	0	0	0	0	0	0	0
otu940	2	1	0	0	0	0	0	111	0	43	12	0	84	4	40	0	0	0
otu942	0	0	2	0	0	0	5	40	0	0	0	0	43	0	178	0	0	0
otu943	0	0	0	0	0	168	0	0	0	0	0	0	0	0	0	0	0	0
otu944	2	0	0	0	0	0	65	36	9	0	0	0	0	0	0	0	0	0
otu945	0	0	0	0	0	154	0	6	0	0	0	0	1	0	1	0	0	0
otu946	2	195	0	0	0	0	0	0	0	0	0	0	0	0	0	0	0	0
otu947	0	0	1	0	0	0	11	3	9	17	0	0	0	0	67	0	0	0
otu948	0	0	0	0	0	0	0	0	0	0	0	0	0	0	152	0	0	0
otu949	0	0	0	228	0	1	2	5	8	5	57	16	6	0	2	0	0	0
otu950	0	0	0	0	0	0	0	0	0	181	0	0	36	0	0	0	0	0
otu951	0	2	0	0	28	116	0	0	0	0	0	0	0	10	0	0	0	0
otu952	0	0	0	0	0	0	0	0	0	19	0	0	0	0	0	0	0	0
otu953	0	0	0	1	65	0	2	0	0	0	0	0	0	67	0	0	0	0
otu954	0	0	325	0	0	0	0	0	0	0	0	0	0	0	0	0	0	0
otu955	0	1	1	0	0	0	1	14	0	2	0	0	0	1	0	0	0	0
otu956	0	0	0	0	22	71	13	0	0	0	0	0	0	17	0	0	0	0
otu957	0	0	0	0	0	0	0	0	0	0	33	0	148	7	91	0	0	0
otu958	0	0	1	0	0	0	129	17	62	0	0	0	0	0	0	0	0	0
otu959	0	0	0	0	0	0	12	0	0	0	0	0	0	5	130	0	0	0
otu960	0	0	220	0	0	0	0	0	38	1	0	0	0	0	0	11	0	0
otu961	0	1	0	0	0	0	0	0	0	0	0	0	143	8	21	0	0	0
otu962	0	1	1	0	0	0	9	0	32	35	0	0	0	30	78	0	0	0
otu963	0	0	0	187	0	0	0	0	0	0	0	0	0	0	0	0	0	0
otu964	0	0	0	3	6	9	2	0	0	0	0	6	0	0	5	0	0	0
otu965	46	155	59	0	0	0	0	0	0	0	0	0	0	0	0	0	0	0
otu966	2	14	5	0	0	0	0	10	0	6	0	0	6	36	34	0	0	0
otu967	0	0	0	0	0	0	0	0	8	0	0	0	27	0	161	0	0	0
otu968	6	27	21	0	27	6	6	5	4	6	0	1	7	15	9	4	1	1
otu969	0	1	1	0	0	0	0	0	0	7	0	0	0	1	112	0	0	0
otu970	3	0	0	0	3	130	4	0	0	0	0	0	13	0	0	0	0	0
otu971	2	23	0	0	0	0	0	0	0	0	0	0	0	0	0	0	0	0
otu972	9	0	0	0	0	0	0	0	0	0	0	0	51	0	78	1	0	0
otu973	168	35	0	0	0	0	0	0	0	0	0	0	0	0	0	0	0	18
otu974	0	0	77	0	0	0	0	0	4	0	0	0	0	0	0	2	0	0
otu975	0	0	0	0	19	183	0	0	0	0	0	3	4	0	0	0	0	0
otu976	0	0	0	0	0	0	166	0	0	0	0	0	0	0	0	0	0	0
otu977	0	0	0	0	0	0	0	0	0	17	171	90	0	0	1	0	0	0
otu979	365	99	4	0	0	0	0	0	0	0	0	0	0	0	0	0	0	0
otu980	0	0	0	0	0	0	169	0	0	0	0	0	0	0	1	0	0	0
otu981	0	0	0	0	0	0	0	0	175	0	0	1	0	0	0	0	0	0
otu982	12	0	0	0	0	0	0	0	0	0	0	0	0	0	0	0	0	0
otu983	0	0	3	0	0	0	15	8	109	0	12	0	0	0	0	0	0	0
otu984	0	11	1	0	0	0	0	0	0	0	0	0	0	0	0	0	0	0
otu985	0	0	0	0	144	0	0	0	0	0	0	0	0	0	0	0	0	0
otu986	0	0	0	0	0	0	0	100	0	0	0	0	0	0	0	0	0	0
otu988	416	29	1	15	0	0	0	0	0	0	0	0	0	0	0	0	0	0
otu989	0	0	0	0	0	0	72	0	0	17	0	0	0	123	10	0	0	0
otu990	0	0	0	0	0	0	0	0	0	93	0	0	0	0	0	0	0	0
otu991	157	78	0	0	0	1	13	15	0	0	0	0	0	101	0	1	1	0
otu992	0	0	0	0	0	0	4	0	0	0	0	0	0	147	0	0	0	0
otu993	0	0	451	0	0	0	0	0	0	0	0	0	0	0	0	5	0	1
otu994	0	0	0	0	0	0	0	0	0	77	23	0	0	3	0	0	0	0
otu995	0	0	0	0	0	0	0	0	0	0	0	0	88	9	68	0	0	0
otu996	0	0	101	40	0	0	0	0	0	60	0	0	12	0	0	0	0	0
otu997	0	0	92	0	0	0	0	0	0	0	0	0	0	0	0	0	0	0
otu998	0	0	0	0	0	3	0	0	0	13	0	0	0	0	0	0	0	0
otu999	1	2	13	0	0	0	16	0	223	0	0	0	19	11	0	0	0	0
otu1000	1	1	0	0	113	0	0	17	0	0	0	0	0	0	1	0	0	1
otu1001	0	0	0	0	0	191	0	0	0	0	0	0	0	0	0	0	0	0
otu1002	0	0	0	0	12	2	0	0	1	0	0	1	0	0	0	0	0	0
otu1003	0	0	0	0	0	83	0	0	0	0	0	0	0	0	0	0	0	0
otu1004	3	5	0	7	33	54	4	0	35	0	0	2	0	16	15	0	0	0
otu1005	0	0	0	0	0	49	0	0	0	0	0	0	0	0	0	0	0	0
otu1006	1	0	4	0	0	0	23	74	74	0	56	0	0	0	0	0	0	0
otu1007	1	0	7	0	0	0	0	0	0	0	0	0	0	155	0	0	0	0
otu1008	0	0	23	0	0	0	0	0	1	79	0	0	0	0	28	0	0	0
otu1009	0	0	0	0	0	0	117	6	0	0	0	0	0	0	0	0	0	0
otu1010	0	0	0	0	12	0	0	0	0	1	0	3	4	0	0	0	2	0
otu1011	10	9	1	0	0	0	0	0	0	0	0	0	0	0	0	0	0	0
otu1012	0	0	0	0	0	0	13	13	0	71	45	13	0	0	0	0	0	0
otu1013	0	0	17	0	0	0	0	0	0	0	0	0	0	0	0	1	0	0
otu1014	5	3	3	180	1	0	0	0	0	23	0	0	55	0	0	0	0	0
otu1015	1	5	2	0	29	0	0	0	0	0	0	12	77	0	28	0	0	0
otu1016	0	0	0	0	0	0	0	0	0	0	0	116	0	0	0	0	0	0
otu1017	0	0	0	0	0	0	0	16	0	0	0	0	0	0	0	0	0	0
otu1018	4	1	18	0	0	0	22	24	3	0	13	0	6	10	13	0	1	0
otu1019	0	0	0	0	0	0	2	3	17	6	124	2	3	0	1	0	0	0
otu1020	1	0	1	45	65	2	0	0	0	0	0	9	1	0	0	0	0	0
otu1021	0	0	0	0	0	0	2	1	12	0	3	0	0	0	0	0	0	0
otu1022	1	0	0	0	1	3	0	0	0	0	0	7	1	0	3	5	0	168
otu1023	0	0	0	0	0	0	0	0	0	21	21	36	0	0	0	0	0	0
otu1024	0	3	0	0	0	0	0	0	46	0	0	17	255	0	21	0	0	0
otu1025	3	47	0	0	0	0	0	0	0	0	0	0	0	0	0	0	0	0
otu1026	0	13	0	0	0	0	0	0	0	0	0	0	0	0	0	0	0	0
otu1027	1	0	5	0	119	0	0	0	0	0	0	0	0	0	0	0	0	0
otu1028	0	0	17	0	0	0	0	0	0	0	0	0	0	0	0	1	0	0
otu1029	0	0	0	145	0	0	0	0	0	0	0	0	0	0	1	0	0	0
otu1030	0	0	0	0	1	0	17	4	20	3	4	19	22	0	10	0	0	0
otu1031	21	154	39	0	0	0	0	0	0	0	0	0	0	0	0	0	0	0
otu1032	0	0	0	0	0	0	0	50	0	0	0	0	0	16	0	0	0	0
otu1033	1	0	0	0	0	50	0	0	0	17	43	0	0	0	0	0	1	0
otu1034	0	31	0	0	0	0	0	0	0	0	0	0	0	0	0	0	0	0
otu1035	367	2	0	0	0	0	0	0	0	0	0	0	0	0	0	4	9	25
otu1036	0	0	13	0	0	0	0	123	15	117	0	4	0	0	108	0	0	0
otu1037	0	0	0	0	0	0	0	0	0	0	0	0	0	0	0	3	0	37
otu1038	0	0	0	0	0	0	13	54	5	36	0	0	0	19	0	0	0	0
otu1039	0	0	0	0	0	0	0	0	104	0	0	0	0	0	0	0	0	0
otu1040	0	0	1	0	0	0	19	15	90	0	0	0	0	0	0	0	0	0
otu1041	13	14	0	0	0	0	0	0	0	0	0	0	0	0	0	0	0	0
otu1042	0	0	0	0	0	0	61	0	0	0	0	0	0	0	0	0	0	0
otu1043	0	0	0	0	0	0	0	0	0	0	0	0	31	2	59	0	0	0
otu1044	0	3	2	0	0	0	24	128	0	0	0	0	0	8	0	0	0	0
otu1045	0	13	0	1	0	0	0	0	0	0	0	0	0	0	0	0	0	0
otu1046	77	3	0	0	0	0	0	0	0	0	0	0	0	0	0	0	0	0
otu1047	0	0	0	0	0	0	0	0	0	0	0	0	0	0	215	0	0	0
otu1048	10	0	0	0	0	0	45	2	1	0	0	0	36	7	73	0	0	0
otu1049	0	0	0	0	0	0	0	0	5	120	0	0	1	0	16	0	0	0
otu1050	0	0	0	0	0	0	0	0	0	0	0	0	0	0	83	0	0	0
otu1051	3	251	53	0	0	0	0	0	0	0	0	0	0	0	0	0	0	0
otu1052	0	0	0	0	0	14	0	38	1	0	0	0	0	0	0	0	0	0
otu1053	216	58	0	0	0	0	0	0	0	0	0	0	0	0	0	0	0	0
otu1054	0	0	0	0	0	0	0	0	16	0	0	0	0	0	0	0	0	0
otu1055	0	0	2	0	0	0	4	0	0	27	7	0	5	37	2	0	0	0
otu1056	0	0	0	0	0	1	21	3	21	0	0	0	0	0	0	0	0	0
otu1057	0	0	0	0	0	0	0	0	0	131	0	0	0	0	0	0	0	0
otu1058	0	1	0	16	33	0	0	9	4	0	63	0	0	0	26	0	0	0
otu1059	1	0	9	0	30	0	8	6	2	3	1	11	10	5	0	14	3	16
otu1060	0	0	0	0	0	0	0	0	0	110	0	0	0	0	0	0	0	0
otu1061	0	0	0	42	1	1	0	0	0	0	0	0	0	1	0	0	0	0
otu1062	0	0	0	56	54	6	0	0	0	3	0	18	9	1	5	0	0	0
otu1063	0	0	1	0	0	0	8	0	23	52	0	111	0	0	70	0	0	1
otu1064	10	231	0	0	0	0	0	0	0	0	0	0	0	0	0	0	0	0
otu1065	0	261	0	0	0	0	0	0	0	0	0	0	0	0	0	0	0	0
otu1066	0	0	0	0	0	88	2	0	0	0	0	0	0	0	0	0	0	0
otu1067	0	0	0	0	0	84	0	0	17	6	32	4	49	6	6	0	0	1
otu1068	8	76	14	0	0	0	18	0	0	0	0	0	31	49	15	1	0	12
otu1069	8	20	10	0	37	4	2	0	1	2	0	9	20	2	5	7	0	25
otu1070	0	0	0	0	0	0	0	0	4	8	23	0	0	0	0	0	0	0
otu1071	0	0	0	0	0	0	0	0	17	57	214	1	0	0	0	0	0	0
otu1072	0	1	0	0	0	0	84	0	0	0	0	0	0	0	0	0	0	0
otu1073	0	0	0	0	0	0	0	0	0	0	0	0	0	0	90	0	0	0
otu1074	0	0	13	0	0	0	0	0	0	0	0	0	0	0	0	0	0	0
otu1075	0	0	0	0	0	0	0	0	0	0	0	0	66	0	37	0	0	0
otu1077	0	0	0	0	0	227	0	0	0	0	0	2	0	0	0	0	0	3
otu1078	0	0	0	0	0	144	2	0	0	0	0	0	0	1	0	0	0	0
otu1079	0	0	0	0	0	0	0	148	0	0	0	0	0	0	0	0	0	0
otu1080	1	0	35	0	0	0	0	80	0	0	1	0	0	99	0	4	0	0
otu1081	0	0	0	0	0	0	0	0	0	0	0	0	0	1	0	1	0	55
otu1082	0	2	20	13	11	131	0	0	0	0	0	0	0	0	0	1	0	0
otu1083	0	0	0	0	0	111	0	0	0	0	0	0	0	0	0	0	0	0
otu1084	0	0	0	0	0	0	0	0	0	0	0	0	0	0	108	0	0	0
otu1085	0	0	0	0	0	0	0	0	0	0	0	13	0	0	0	0	0	0
otu1086	0	0	0	0	0	0	0	0	0	13	0	0	0	0	0	0	0	0
otu1087	0	0	2	0	0	0	4	0	0	97	0	10	0	3	0	0	0	0
otu1088	0	0	4	0	0	0	4	69	0	0	0	0	10	0	15	0	0	0
otu1089	295	0	0	0	0	0	0	0	0	0	0	0	0	0	0	0	0	0
otu1090	0	0	0	0	58	0	0	0	0	0	0	0	0	0	0	0	0	0
otu1091	0	0	0	0	0	0	0	0	0	0	0	14	0	0	0	0	0	0
otu1092	3	2	1	0	0	0	0	58	51	0	0	0	0	15	0	1	0	0
otu1093	0	0	0	0	0	0	0	0	0	0	0	0	0	14	0	0	0	0
otu1094	0	0	0	0	0	0	0	0	0	210	0	0	0	0	0	0	0	0
otu1095	9	0	0	0	0	14	0	0	0	0	0	0	5	0	7	0	0	4
otu1096	0	0	0	1	0	0	0	0	0	0	3	0	181	0	0	0	0	0
otu1097	0	0	0	0	0	10	1	0	2	0	0	0	0	0	0	0	0	0
otu1099	0	0	0	0	0	0	0	0	31	0	0	0	0	0	0	0	0	0
otu1100	0	0	0	0	0	0	0	0	0	56	0	207	0	0	0	0	0	0
otu1101	12	6	8	0	11	0	1	1	0	0	0	2	0	3	1	1	0	0
otu1102	0	0	0	0	0	0	0	0	0	11	0	0	0	0	0	0	0	0
otu1103	10	0	5	0	96	0	0	0	0	0	0	0	0	1	0	0	0	0
otu1104	0	0	0	1	1	0	0	0	0	114	0	0	0	0	0	0	0	0
otu1105	0	0	0	0	0	0	2	0	100	2	26	1	0	0	0	0	0	0
otu1106	0	0	1	56	0	0	19	14	16	10	109	17	17	0	13	0	0	0
otu1107	13	1	0	0	0	0	0	0	0	0	0	0	0	0	0	0	0	0
otu1108	0	0	0	0	2	1	0	0	0	0	0	0	13	0	124	0	0	0
otu1109	0	282	0	0	0	0	0	0	0	0	0	0	0	0	0	0	0	0
otu1110	0	0	0	0	0	0	0	0	0	0	0	0	127	0	23	0	0	0
otu1111	0	0	0	0	3	18	0	0	0	0	0	0	2	0	0	0	0	0
otu1112	0	0	4	0	0	90	8	14	0	18	1	18	14	5	15	0	0	1
otu1113	20	20	80	0	0	0	0	0	0	0	0	0	0	54	46	0	3	0
otu1114	0	0	1	0	0	0	17	18	18	1	0	31	20	0	5	0	0	0
otu1115	39	11	0	0	0	0	0	0	0	0	0	0	0	0	0	0	0	0
otu1116	3	231	0	5	8	0	0	0	0	0	0	0	34	0	0	0	0	0
otu1117	0	2	1	0	0	0	5	0	9	0	0	0	0	32	0	0	0	0
otu1118	0	0	1	0	0	0	11	47	157	7	18	8	88	0	17	0	0	0
otu1119	0	0	0	0	0	0	6	8	8	0	0	96	0	0	1	0	0	0
otu1120	0	0	0	5	0	0	0	0	0	0	0	5	0	0	1	0	0	0
otu1122	0	0	0	0	1	0	0	4	0	0	0	0	0	105	57	0	0	0
otu1123	0	0	14	22	9	84	0	0	0	0	0	0	0	2	0	0	0	0
otu1124	0	13	0	0	0	0	0	0	0	0	0	0	0	0	0	0	0	0
otu1125	0	0	0	0	0	0	0	30	0	0	0	0	0	0	0	0	0	0
otu1126	2	0	2	0	0	0	0	0	0	108	0	0	0	0	0	0	0	0
otu1127	0	0	0	0	0	0	0	0	0	0	0	0	0	14	0	0	0	0
otu1128	1	0	0	0	0	0	29	0	51	55	0	0	0	0	0	0	0	0
otu1129	0	0	1	0	0	0	0	0	22	0	0	0	3	0	0	0	0	0
otu1130	0	0	0	0	0	0	0	120	0	0	0	0	0	0	0	0	0	0
otu1131	10	1	0	0	0	0	0	0	0	0	0	0	0	0	0	0	0	1
otu1132	0	10	2	0	0	0	0	0	0	0	0	0	0	0	0	0	0	0
otu1133	0	0	0	0	0	0	0	0	0	0	0	22	0	0	0	0	0	0
otu1134	0	177	0	0	0	0	0	0	0	0	0	0	0	0	0	0	0	0
otu1135	3	0	0	0	0	0	0	31	4	54	0	0	0	0	0	0	0	0
otu1136	0	0	0	0	0	0	9	0	0	0	0	0	175	0	108	0	0	0
otu1137	0	0	0	0	0	0	94	0	0	0	0	0	0	0	0	0	0	0
otu1138	4	7	8	0	69	0	7	0	0	1	0	0	0	7	33	0	0	0
otu1139	0	0	0	0	0	0	0	0	0	0	0	0	158	0	0	0	0	0
otu1141	0	2	4	0	0	0	4	29	15	0	0	4	118	0	0	0	0	4
otu1142	0	0	1	0	0	0	0	72	0	50	0	0	0	0	0	0	0	0
otu1143	0	0	0	0	0	0	0	0	0	0	0	0	0	12	0	0	0	0
otu1144	0	0	0	0	0	0	0	0	0	0	0	0	53	0	89	0	0	0
otu1145	0	0	276	0	0	0	0	0	0	0	0	12	0	0	0	0	0	0
otu1146	0	0	2	0	6	127	2	0	8	0	0	0	0	0	0	0	0	0
otu1147	0	0	0	0	0	0	51	0	0	0	0	0	0	0	0	0	0	0
otu1148	0	0	0	0	0	0	0	0	0	77	0	0	0	0	0	0	0	0
otu1149	0	0	0	1	0	1	6	9	14	3	13	34	5	0	5	0	0	0
otu1150	0	0	0	0	0	0	0	0	0	0	0	0	11	3	3	0	0	0
otu1151	0	0	1	0	0	0	0	7	16	0	0	0	0	0	0	0	0	0
otu1152	0	0	3	70	1	2	7	5	21	6	39	25	16	0	9	0	0	0
otu1153	0	0	0	0	0	0	0	0	12	32	49	0	0	0	0	0	0	0
otu1154	0	0	0	0	0	0	0	0	176	0	0	0	0	1	0	0	0	0
otu1155	0	0	1	0	0	0	20	25	10	20	43	69	0	0	0	0	0	0
otu1156	0	0	0	0	0	0	0	0	8	5	0	0	33	16	8	0	0	0
otu1157	0	0	0	0	0	0	0	0	0	2	0	14	0	0	0	0	0	0
otu1158	0	293	14	0	0	0	0	0	0	0	0	0	0	0	0	0	0	0
otu1159	0	0	0	0	0	0	0	0	5	35	0	0	187	0	0	0	0	2
otu1161	0	0	3	0	0	0	28	109	0	0	0	0	0	1	0	0	0	0
otu1162	0	0	0	0	0	0	0	0	0	0	19	2	0	0	0	0	0	0
otu1163	0	0	0	0	0	0	0	0	0	0	0	0	3	1	0	70	0	1
otu1164	0	0	0	0	232	0	0	0	0	0	0	0	0	0	0	0	0	0
otu1165	77	118	0	0	0	0	0	0	0	0	0	0	0	0	0	0	0	0
otu1166	0	0	2	0	1	0	90	4	66	26	146	20	0	0	0	0	0	0
otu1167	0	0	0	0	0	0	6	41	23	0	12	98	0	0	0	0	0	0
otu1168	5	1	0	0	13	0	12	55	16	0	24	5	27	0	0	0	0	0
otu1169	0	0	0	0	0	0	0	0	0	4	1	11	0	0	0	0	0	0
otu1170	0	0	0	0	0	0	43	0	0	0	0	0	0	0	0	0	0	0
otu1171	0	0	0	0	0	0	0	0	0	0	0	0	0	0	18	0	0	0
otu1172	0	0	0	0	0	0	0	0	0	184	0	0	0	0	0	0	0	0
otu1173	0	0	0	0	0	0	0	0	0	147	0	0	0	3	0	0	0	0
otu1174	0	1	3	0	0	86	0	0	0	25	48	0	0	0	0	0	0	0
otu1176	3	13	1	0	44	0	11	8	12	33	0	0	9	0	63	2	0	33
otu1177	0	0	0	0	0	0	2	0	81	0	0	0	0	0	0	0	0	0
otu1178	0	0	1	0	0	0	0	0	7	54	19	0	0	2	0	0	0	0
otu1179	0	0	16	0	0	0	0	0	0	0	0	0	0	0	0	0	0	0
otu1180	0	0	0	98	0	0	7	8	1	6	170	5	20	0	11	0	0	0
otu1181	0	0	0	0	0	65	0	0	0	0	0	40	0	0	0	0	0	0
otu1182	0	1	2	45	0	48	0	0	0	9	0	41	0	0	22	0	0	0
otu1183	0	0	0	0	0	0	0	0	0	0	0	113	0	0	0	0	0	0
otu1184	0	0	0	0	0	0	0	0	104	0	20	0	0	0	0	0	0	0
otu1185	0	0	0	0	0	0	1	0	12	0	0	0	112	0	0	0	0	0
otu1186	10	0	0	0	0	0	0	0	0	0	0	0	0	0	0	0	0	0
otu1187	36	7	7	0	0	0	0	0	31	0	0	0	97	20	38	0	0	4
otu1188	12	2	0	0	0	0	0	0	0	0	0	0	0	0	0	0	0	0
otu1190	9	1	3	0	0	0	0	0	0	0	0	0	0	0	0	0	0	0
otu1191	0	0	2	0	0	129	5	9	1	0	0	43	0	1	0	0	0	0
otu1192	12	0	2	0	80	0	12	70	0	0	0	0	0	24	0	0	0	0
otu1193	0	0	1	0	0	0	7	0	0	129	0	0	0	3	0	0	0	0
otu1194	0	0	0	0	53	0	0	0	8	0	20	0	19	0	20	0	0	0
otu1195	28	119	86	0	0	0	0	0	0	0	0	0	0	0	0	0	0	0
otu1196	0	12	0	0	0	0	0	0	0	0	0	0	0	0	0	0	0	0
otu1197	0	0	0	0	3	6	0	0	0	0	0	0	0	0	3	0	0	0
otu1198	0	0	0	0	0	0	0	0	0	0	0	188	0	0	0	0	0	0
otu1199	2	14	0	0	0	0	0	0	0	0	0	0	0	0	0	0	0	0
otu1200	0	0	0	0	0	0	0	0	31	0	24	5	0	0	0	0	0	0
otu1201	0	0	0	0	0	0	0	3	36	3	6	0	0	0	0	0	0	0
otu1202	0	172	0	0	0	0	0	0	0	0	0	0	0	0	0	0	0	0
otu1203	2	0	6	0	0	0	0	0	0	0	0	0	0	0	149	0	0	0
otu1204	0	0	0	0	0	0	0	0	0	0	0	0	0	9	5	0	0	0
otu1205	0	0	16	0	0	0	0	0	0	0	0	0	0	0	0	0	0	0
otu1206	0	0	0	0	0	0	0	0	1	21	0	36	94	0	75	0	0	0
otu1207	0	0	6	5	0	44	3	0	17	0	39	0	0	6	0	0	0	0
otu1208	0	0	0	0	61	0	0	0	6	0	0	0	0	3	0	0	0	0
otu1209	1	5	0	0	0	83	0	0	0	0	0	0	0	0	0	0	0	0
otu1210	0	0	0	0	0	0	4	1	7	0	0	0	0	0	0	0	0	0
otu1211	0	0	0	1	0	0	6	4	24	11	27	66	1	0	7	0	0	0
otu1212	0	0	0	0	94	0	0	0	0	0	0	0	0	0	0	0	0	0
otu1213	2	1	1	0	8	0	0	0	0	0	0	1	1	1	3	1	0	4
otu1214	0	0	0	46	0	69	0	0	0	0	0	0	0	0	0	0	0	0
otu1215	0	0	3	0	0	1	13	10	21	3	5	30	9	0	3	0	0	0
otu1216	0	39	0	0	0	0	0	0	0	0	0	0	0	0	0	0	0	0
otu1217	1	0	10	0	0	0	23	0	19	0	284	0	0	0	0	0	0	0
otu1218	0	0	0	0	0	0	65	17	0	0	15	0	0	0	0	0	0	0
otu1219	3	0	16	0	0	0	19	0	109	0	22	0	0	0	0	0	1	0
otu1220	0	2	1	0	0	0	0	1	0	3	0	0	0	0	2	2	0	8
otu1221	0	0	0	0	0	0	0	0	2	1	0	0	13	0	0	0	0	0
otu1222	0	13	1	0	0	0	0	0	0	0	0	0	0	0	0	0	0	0
otu1223	11	12	0	0	0	0	0	0	0	35	0	0	0	0	64	1	1	0
otu1224	27	18	2	0	0	0	5	0	0	0	0	0	6	29	5	0	0	0
otu1225	0	0	0	0	0	0	0	0	0	0	0	0	0	58	0	0	0	0
otu1226	0	0	0	0	0	0	96	0	0	0	0	0	0	0	0	0	0	0
otu1227	0	0	0	0	0	0	17	26	66	0	0	0	0	18	0	0	0	0
otu1228	0	1	0	0	0	0	0	0	0	2	0	0	10	0	0	0	0	0
otu1229	0	0	0	0	0	0	10	0	33	0	14	134	0	0	0	0	0	0
otu1230	0	0	0	0	0	0	0	0	0	0	0	0	11	1	41	1	0	1
otu1231	0	0	14	0	0	0	0	0	0	0	0	0	0	0	0	1	0	0
otu1232	0	0	0	0	0	76	0	0	0	0	0	0	0	0	0	0	0	0
otu1233	0	0	0	0	0	0	0	26	14	74	0	0	0	5	0	0	0	0
otu1234	0	0	2	0	5	0	0	0	0	0	0	6	4	0	0	0	0	0
otu1235	10	0	0	0	0	0	0	0	0	0	0	0	0	0	0	0	0	0
otu1236	2	35	0	0	0	0	0	0	0	0	0	0	0	0	0	0	0	0
otu1237	0	0	0	0	0	0	0	0	0	0	94	0	0	0	0	0	0	0
otu1238	1	0	0	0	0	2	0	0	0	0	0	2	0	0	0	1	0	34
otu1239	0	0	0	0	0	0	5	23	38	0	0	21	0	0	21	0	0	0
otu1240	0	0	0	0	0	0	0	0	0	0	0	0	1	4	4	0	0	0
otu1241	0	0	0	0	0	0	0	14	0	0	0	0	0	0	0	0	0	0
otu1242	0	0	2	0	0	0	0	0	0	0	0	0	14	0	0	0	0	0
otu1243	3	2	0	22	18	0	31	5	6	6	8	67	17	0	0	0	0	0
otu1245	0	0	0	0	0	0	1	41	34	134	0	0	0	0	1	0	0	0
otu1247	0	0	0	0	0	0	0	0	0	0	0	0	37	0	167	0	0	0
otu1248	0	83	0	0	0	0	0	0	0	0	0	0	0	0	0	0	0	0
otu1249	2	10	18	0	1	0	0	0	0	2	0	0	29	0	8	1	0	1
otu1250	0	0	0	0	0	0	0	0	0	0	0	0	0	87	0	0	0	0
otu1251	0	0	1	0	126	7	0	0	0	1	0	38	10	1	0	2	0	6
otu1252	0	0	0	0	0	0	0	14	0	0	0	0	0	0	0	0	0	0
otu1253	2	0	0	1	0	3	0	0	0	0	1	2	0	0	0	0	0	0
otu1254	0	0	0	0	0	0	0	0	0	0	0	0	106	0	0	0	0	0
otu1255	0	0	2	0	0	0	2	1	8	6	126	6	0	0	1	0	0	0
otu1256	0	0	2	0	0	0	2	0	20	0	0	0	1	1	0	0	0	0
otu1257	0	2	0	0	0	0	41	37	15	0	0	0	0	1	0	0	0	0
otu1258	0	0	0	0	0	0	0	0	0	0	0	8	0	0	1	0	0	0
otu1259	0	0	0	0	0	9	1	0	0	0	2	0	0	0	1	0	0	0
otu1260	0	0	1	0	0	0	0	0	0	0	0	0	33	2	168	0	0	0
otu1261	0	0	0	0	6	0	0	0	0	0	0	0	36	3	173	0	0	3
otu1262	4	24	0	0	0	0	0	0	0	0	0	0	0	0	0	0	0	0
otu1263	0	0	0	0	0	0	0	0	0	0	0	0	19	46	37	0	0	0
otu1264	0	0	0	0	0	0	3	3	23	0	0	0	0	12	4	0	0	0
otu1265	0	0	0	0	0	0	0	0	188	1	0	0	0	0	0	0	0	0
otu1266	0	0	0	0	0	0	0	0	113	0	0	0	0	0	0	0	0	0
otu1267	0	0	0	189	12	0	0	0	0	0	0	0	0	0	0	0	0	0
otu1268	12	0	22	0	0	0	0	0	0	0	0	0	0	1	0	0	0	0
otu1269	0	0	0	0	184	0	10	0	8	0	0	14	6	1	0	0	0	0
otu1270	0	0	1	1	0	0	115	5	7	14	0	18	0	2	0	0	0	0
otu1271	0	0	0	0	0	0	0	0	126	0	0	0	0	0	0	0	0	0
otu1272	162	2	1	0	0	0	0	0	0	0	0	0	0	0	0	0	0	0
otu1273	0	0	0	0	2	82	0	0	0	6	0	51	0	15	11	0	0	5
otu1274	0	0	0	0	0	0	0	2	2	0	0	0	16	0	0	0	0	0
otu1276	0	0	0	0	0	0	0	93	0	0	0	0	0	0	0	0	0	0
otu1277	1	0	0	0	0	20	0	0	0	0	0	0	0	0	0	0	0	0
otu1278	0	38	0	0	0	0	0	0	0	0	0	0	0	0	0	0	0	0
otu1279	0	0	0	0	0	0	0	59	0	0	0	0	0	0	0	0	0	0
otu1280	0	0	0	0	1	143	0	0	0	0	0	0	0	0	0	0	0	0
otu1281	0	0	0	121	0	0	0	0	0	0	0	0	0	0	0	0	0	0
otu1282	3	1	0	0	1	0	0	0	0	0	0	0	0	109	0	0	0	0
otu1283	1	0	2	56	0	0	7	0	37	0	0	0	0	0	38	0	0	0
otu1284	0	0	1	0	0	54	0	2	5	15	0	0	0	0	0	0	0	0
otu1285	0	0	0	25	0	0	0	0	0	0	0	0	0	0	0	0	0	0
otu1286	16	2	0	0	0	0	0	0	0	0	0	0	0	0	0	0	0	0
otu1287	1	1	1	0	0	2	0	0	0	0	0	0	1	4	1	0	0	0
otu1288	0	0	0	0	0	0	0	0	1	0	10	0	0	0	0	0	0	0
otu1289	0	0	0	0	0	0	0	0	12	2	3	0	0	0	0	0	0	0
otu1290	0	0	0	0	0	0	0	0	0	31	31	0	0	0	0	0	0	0
otu1291	15	3	0	0	0	0	0	0	0	0	0	0	0	0	0	0	0	0
otu1292	10	0	0	0	0	0	0	0	0	0	0	0	0	0	0	0	0	0
otu1293	0	0	0	0	0	0	0	10	0	0	0	0	0	0	0	0	0	0
otu1294	0	0	0	0	4	4	0	0	0	0	0	2	0	0	0	0	0	0
otu1295	0	8	0	0	1	0	1	0	0	0	0	0	0	0	1	0	0	0
otu1296	0	2	0	1	51	1	1	1	0	1	0	23	6	1	0	3	0	27
otu1297	0	0	0	1	0	0	0	17	101	0	0	0	0	0	0	0	0	0
otu1298	9	0	4	0	0	0	38	39	33	0	0	0	55	23	0	0	0	0
otu1299	0	0	0	0	0	0	0	0	0	154	0	0	0	0	0	0	0	0
otu1300	127	83	0	0	0	0	0	0	0	0	0	0	0	0	0	0	0	0
otu1301	2	86	33	0	10	89	0	0	16	0	0	0	0	0	0	0	0	1
otu1302	5	0	15	0	0	0	0	0	112	0	0	0	0	0	0	0	0	0
otu1303	0	0	0	0	0	0	0	0	0	123	0	0	0	0	0	0	0	0
otu1304	0	0	0	0	0	0	0	0	8	0	0	0	15	0	121	0	0	0
otu1305	0	1	7	0	0	0	22	19	37	37	0	0	0	0	0	0	0	0
otu1306	0	0	13	0	0	0	0	0	0	49	0	42	23	0	0	0	0	0
otu1307	0	0	0	0	0	0	0	0	0	106	0	0	0	0	0	0	0	0
otu1308	0	0	0	0	0	135	0	0	0	0	0	0	0	0	0	0	0	0
otu1309	0	0	5	0	0	0	4	50	68	6	3	5	39	1	15	0	1	0
otu1310	0	0	2	0	0	0	0	0	112	0	0	0	0	0	0	0	0	0
otu1311	0	1	0	0	0	0	0	0	0	0	0	0	165	0	0	0	0	0
otu1312	147	16	7	0	0	0	0	0	0	0	0	0	0	0	0	0	0	0
otu1313	0	0	3	0	0	0	5	0	18	205	26	0	0	0	1	0	0	0
otu1314	0	1	0	0	0	0	0	0	0	60	0	0	0	0	0	0	0	0
otu1315	62	19	0	0	0	0	0	0	0	0	0	0	0	0	0	0	0	0
otu1316	0	0	1	13	23	0	0	20	1	13	22	0	16	0	0	0	0	0
otu1317	0	0	0	0	124	0	0	0	0	0	0	0	0	0	0	0	0	0
otu1318	6	12	7	0	0	0	0	0	0	63	0	0	0	0	2	0	0	0
otu1319	2	10	0	0	0	0	0	0	0	0	0	0	0	0	0	0	0	0
otu1320	0	0	0	0	0	0	3	11	0	0	0	0	0	0	0	0	0	0
otu1321	0	0	0	0	0	147	0	0	0	0	0	0	0	0	0	0	0	0
otu1323	0	3	1	0	0	0	0	0	0	0	0	0	5	5	1	0	0	0
otu1324	0	0	1	0	0	95	0	0	0	16	0	0	0	0	0	0	0	0
otu1325	0	0	1	0	0	0	0	0	0	166	0	0	0	0	0	0	0	0
otu1326	0	0	0	0	0	0	0	0	5	0	0	0	14	0	3	0	0	0
otu1327	3	0	7	0	1	0	6	84	23	31	51	12	16	7	0	0	0	0
otu1328	0	0	0	0	0	6	0	0	0	0	3	0	0	0	0	0	0	0
otu1329	214	170	1	0	0	0	0	0	0	0	0	0	0	0	0	0	0	0
otu1330	0	0	289	5	0	0	0	0	0	0	0	0	0	0	0	2	0	0
otu1331	0	350	0	0	0	0	0	0	0	0	0	0	0	0	0	0	0	0
otu1332	16	204	9	0	0	0	0	0	0	0	0	0	0	0	0	0	0	0
otu1333	4	0	2	0	0	0	0	0	128	0	15	0	0	5	0	0	0	0
otu1334	0	0	0	0	126	0	0	0	0	0	0	0	0	0	0	0	0	0
otu1335	0	0	0	5	0	0	0	1	2	0	0	2	2	0	1	0	0	0
otu1336	58	174	11	0	0	0	0	0	0	0	0	0	0	0	0	0	0	0
otu1337	0	1	0	0	0	84	0	0	0	0	0	0	0	0	0	0	0	0
otu1338	0	10	0	0	0	0	0	0	0	0	0	0	0	0	0	0	0	0
otu1339	0	0	0	144	0	0	0	0	0	1	4	1	1	0	0	0	0	0
otu1340	0	0	0	0	0	0	0	0	0	0	8	0	3	0	0	0	0	0
otu1341	0	1	0	0	27	0	0	0	0	49	46	13	3	3	0	0	0	0
otu1342	0	0	22	0	0	0	0	0	0	0	0	0	0	0	0	1	0	0
otu1343	0	0	0	0	0	0	0	0	1	14	0	0	0	0	0	0	0	0
otu1344	0	0	0	0	71	0	0	0	0	0	0	0	0	0	0	0	0	0
otu1345	0	0	0	0	0	0	1	8	66	3	0	0	13	0	12	0	0	0
otu1346	0	0	0	0	0	0	0	0	0	4	0	0	0	60	39	0	0	0
otu1347	0	0	0	0	0	0	0	0	0	64	0	0	0	0	0	0	0	0
otu1348	0	0	1	0	0	0	4	1	3	1	1	7	5	0	2	0	0	0
otu1349	0	0	0	0	0	0	0	0	0	2	0	0	94	5	0	0	0	0
otu1350	0	0	0	0	0	0	32	0	0	0	0	0	0	0	0	0	0	0
otu1351	0	46	0	0	0	0	0	0	0	0	0	0	0	0	0	0	0	0
otu1352	0	0	0	12	0	0	0	0	0	0	0	0	0	0	0	0	0	0
otu1354	0	0	0	4	0	0	1	0	0	11	0	15	0	2	0	0	0	0
otu1355	0	0	0	0	97	0	0	0	0	0	0	0	0	0	0	0	0	0
otu1356	0	0	82	37	0	0	0	0	0	0	0	0	0	0	0	2	0	0
otu1357	9	2	0	0	0	0	0	1	0	40	0	0	14	0	29	0	0	0
otu1358	0	0	3	0	0	0	14	0	28	0	109	0	0	7	0	0	0	0
otu1359	0	0	0	0	0	0	0	0	0	0	0	0	1	0	91	0	0	0
otu1360	4	0	1	12	0	0	0	0	0	18	0	25	33	24	0	1	0	0
otu1361	0	0	0	0	0	0	0	0	0	0	0	16	0	0	0	0	0	0
otu1362	0	0	0	0	0	71	0	0	0	0	0	10	0	0	0	0	0	0
otu1363	1	0	0	0	0	9	2	0	0	0	0	0	2	0	0	0	0	0
otu1364	0	1	0	0	0	0	0	0	113	0	0	0	0	0	0	0	0	0
otu1365	0	0	0	0	8	0	0	2	0	1	0	0	0	0	0	0	0	0
otu1366	0	0	0	1	66	2	0	0	0	0	0	22	12	0	1	3	0	5
otu1367	0	0	23	0	0	0	0	0	0	0	0	0	0	0	0	0	0	0
otu1368	1	16	0	0	170	0	0	0	0	0	0	1	0	0	0	0	0	0
otu1369	0	0	0	0	0	0	0	0	0	109	0	0	0	0	0	0	0	0
otu1370	0	0	0	0	0	0	0	138	0	0	0	0	0	0	0	0	0	0
otu1371	5	4	0	0	0	0	0	0	0	0	0	0	0	0	0	0	0	0
otu1372	13	16	1	0	0	0	0	0	0	0	0	0	0	0	0	0	0	0
otu1373	0	0	0	0	0	0	0	0	0	0	0	0	0	100	0	0	0	0
otu1374	0	0	0	0	132	0	0	0	0	0	0	0	0	0	0	0	0	0
otu1375	0	0	0	0	0	0	0	0	0	3	49	0	0	0	0	0	0	0
otu1376	0	0	0	102	0	0	1	0	0	0	0	0	0	0	0	0	0	0
otu1377	0	0	6	0	0	0	0	0	98	0	11	0	1	0	0	0	0	0
otu1378	0	0	0	0	0	66	0	0	0	0	0	26	0	0	0	0	0	0
otu1379	0	0	0	0	0	0	0	0	0	0	0	0	22	0	0	0	0	0
otu1380	0	0	0	0	0	0	0	0	0	0	0	9	0	0	0	0	0	0
otu1381	0	0	0	0	0	0	0	0	0	0	0	0	105	13	33	1	0	0
otu1382	0	0	0	0	0	0	0	0	0	0	0	0	0	77	0	0	0	0
otu1383	0	5	0	0	3	0	1	0	0	0	0	0	0	0	1	0	0	0
otu1384	4	0	0	0	0	0	0	0	0	0	0	0	0	0	114	0	0	0
otu1385	0	0	0	0	0	0	0	0	0	0	0	0	0	0	0	0	0	18
otu1386	11	0	0	0	0	0	0	0	0	0	0	0	0	0	0	0	0	0
otu1387	0	2	0	0	0	0	0	0	0	0	0	0	90	0	0	0	0	0
otu1388	0	0	0	0	0	0	30	0	0	0	0	0	0	0	0	0	0	0
otu1389	0	0	0	1	0	0	0	1	7	4	66	6	1	0	0	0	0	0
otu1390	4	1	1	0	0	0	0	87	0	0	0	0	0	1	0	0	0	0
otu1391	0	0	0	0	7	31	4	25	27	15	78	0	24	0	18	0	0	0
otu1392	1	1	1	0	0	0	0	0	0	0	0	0	0	7	1	0	0	0
otu1393	0	0	0	0	0	0	1	0	0	0	0	0	0	1	15	0	0	0
otu1394	10	0	0	0	0	0	0	0	0	0	0	0	0	0	0	0	0	0
otu1395	0	0	1	0	0	0	0	0	0	117	0	41	0	21	0	0	0	0
otu1396	2	0	6	0	0	0	0	46	8	140	83	0	0	3	35	0	0	0
otu1397	0	4	0	0	29	0	40	0	0	0	0	0	0	0	0	0	0	0
otu1398	0	0	0	2	0	0	4	5	23	7	30	232	3	0	6	0	0	0
otu1399	2	49	41	68	0	0	0	0	0	0	0	0	0	0	0	0	0	0
otu1400	0	0	0	0	0	0	0	0	0	0	0	13	0	0	0	0	0	0
otu1402	2	3	0	0	0	0	17	0	0	0	0	0	0	59	0	0	0	0
otu1403	0	0	0	0	0	0	4	0	0	0	31	111	0	0	0	0	0	0
otu1404	0	0	0	0	0	0	0	117	0	0	0	0	0	0	0	0	0	7
otu1405	29	2	0	0	0	0	0	0	0	0	0	0	0	0	0	0	0	0
otu1406	5	91	1	0	0	0	0	0	0	0	0	0	7	11	0	0	0	0
otu1407	1	8	0	1	0	0	0	0	0	0	0	0	0	0	0	0	0	0
otu1408	0	9	0	0	0	0	0	0	0	0	0	0	0	0	0	0	0	0
otu1409	0	0	0	0	0	0	3	10	0	0	0	0	0	0	0	0	0	0
otu1410	0	73	0	0	0	0	0	0	0	0	0	0	0	0	0	0	0	0
otu1411	0	0	0	0	0	0	0	0	14	0	0	0	0	0	0	0	0	0
otu1412	0	0	0	26	5	0	4	0	3	0	0	0	0	0	54	0	0	0
otu1413	0	0	0	0	0	0	2	2	1	2	51	3	0	1	1	0	0	0
otu1415	0	0	0	0	1	0	0	0	0	0	0	0	9	0	17	0	0	0
otu1416	0	0	0	0	0	0	0	20	3	0	0	40	0	0	0	0	0	0
otu1417	0	0	0	0	0	0	0	0	0	0	0	0	10	0	2	0	0	0
otu1419	0	0	0	0	12	0	0	0	0	0	0	0	0	0	0	0	0	0
otu1420	1	5	12	0	0	0	0	31	74	0	0	0	50	0	0	0	0	0
otu1421	0	0	0	0	0	56	0	0	0	0	0	0	46	0	0	0	0	0
otu1422	0	0	0	0	0	0	1	0	0	22	1	0	0	0	0	0	0	0
otu1423	0	0	0	0	0	0	0	0	7	2	137	2	1	0	0	0	0	0
otu1424	0	0	0	0	0	0	0	0	0	0	0	77	0	0	0	0	0	0
otu1425	0	0	0	0	0	0	0	0	0	0	6	125	0	0	0	0	0	0
otu1426	0	204	0	0	0	0	0	0	0	0	0	0	0	0	0	0	0	0
otu1427	0	0	0	0	0	0	2	0	1	4	1	0	0	0	0	0	0	0
otu1428	90	0	0	0	0	0	0	0	0	0	0	0	0	1	0	0	1	2
otu1429	0	0	0	0	0	0	0	0	20	0	0	0	0	0	0	0	0	0
otu1430	0	0	0	0	0	0	0	0	0	8	0	0	0	0	0	0	0	0
otu1431	0	0	0	0	146	0	0	0	0	0	0	0	0	0	0	0	0	0
otu1432	0	0	0	0	0	0	4	0	4	0	4	1	0	0	0	0	0	0
otu1433	26	3	1	0	0	0	0	0	0	0	0	0	0	0	0	0	0	0
otu1434	0	0	0	0	0	0	0	0	0	121	0	0	0	0	0	0	0	0
otu1435	0	1	1	0	0	0	0	1	29	26	0	0	13	0	55	0	0	0
otu1436	0	0	2	0	0	0	15	0	0	95	0	6	0	3	0	0	2	0
otu1437	125	45	0	0	0	0	0	0	0	0	0	0	0	0	0	0	0	0
otu1438	0	0	4	0	0	0	0	0	51	0	0	0	0	3	0	0	0	0
otu1439	0	0	0	0	61	0	0	0	0	0	0	0	0	0	0	0	0	0
otu1440	0	0	0	74	0	0	6	15	5	14	132	6	11	0	2	0	0	0
otu1441	0	0	0	16	0	0	0	0	0	0	3	1	1	0	0	0	0	0
otu1442	0	0	0	0	0	0	2	0	2	1	1	11	0	0	0	0	0	0
otu1443	0	0	0	0	0	0	0	12	0	0	0	0	0	0	0	0	0	0
otu1444	30	212	6	0	0	12	0	0	0	0	0	0	0	0	0	0	0	0
otu1445	0	0	0	0	0	0	0	0	0	0	0	0	0	0	15	0	0	0
otu1446	0	0	0	0	0	0	6	1	0	0	2	0	0	0	0	0	0	0
otu1447	0	0	0	0	0	0	47	0	0	0	0	0	0	0	0	0	0	0
otu1448	0	0	3	0	0	75	0	0	0	0	0	0	0	0	0	0	0	0
otu1449	0	0	0	0	12	0	0	0	0	0	0	0	0	0	0	0	0	0
otu1450	21	23	7	0	0	0	0	0	19	0	0	0	0	0	0	1	70	0
otu1451	13	0	0	0	0	0	0	0	0	0	0	0	0	0	0	0	0	0
otu1452	0	0	0	0	0	0	23	0	0	0	0	56	0	0	0	0	0	0
otu1453	0	0	0	0	0	0	0	0	0	83	0	0	0	0	0	0	0	0
otu1454	0	0	0	0	0	0	0	0	0	1	11	3	0	0	0	0	0	0
otu1455	74	67	0	0	0	0	0	0	0	0	0	0	0	0	0	0	0	0
otu1456	0	0	0	0	8	0	0	0	60	42	18	0	0	0	0	0	0	0
otu1458	0	0	0	0	0	0	0	0	0	0	0	0	0	0	35	0	0	0
otu1459	0	11	0	0	0	0	0	0	0	0	0	0	0	0	0	0	0	0
otu1460	0	0	0	0	0	0	3	1	14	0	0	0	0	0	0	0	0	0
otu1461	0	0	0	0	101	0	0	0	0	0	0	0	0	0	0	0	0	0
otu1462	0	0	0	0	0	0	0	0	0	0	0	0	0	81	0	0	0	0
otu1463	79	55	0	0	0	0	0	0	0	0	0	0	0	0	0	0	0	7
otu1464	0	0	0	0	54	0	2	0	0	0	0	0	0	0	0	0	0	0
otu1465	0	0	0	0	0	0	8	39	76	0	0	0	0	0	0	0	0	0
otu1466	0	0	10	0	0	0	0	0	0	0	0	0	0	0	0	0	0	0
otu1467	8	94	0	0	0	0	0	1	0	0	0	0	0	0	0	0	0	16
otu1468	0	0	0	0	0	0	0	0	0	0	0	0	0	0	0	5	117	137
otu1469	0	0	0	0	0	0	0	0	0	2	121	7	0	5	0	0	0	0
otu1470	0	0	0	0	0	0	0	0	0	0	0	0	0	0	121	0	0	0
otu1471	0	0	0	103	0	0	0	0	0	0	0	0	0	0	0	0	0	0
otu1472	0	0	0	0	0	0	0	0	0	0	0	0	12	0	0	0	0	0
otu1473	70	4	0	0	220	0	0	0	0	0	0	0	0	0	0	0	0	0
otu1474	137	23	0	0	0	0	0	0	0	0	0	0	0	0	0	0	0	0
otu1475	0	0	0	8	0	0	0	0	6	0	0	0	2	0	0	0	0	0
otu1476	1	4	1	0	0	0	0	0	0	0	0	0	23	104	0	0	0	0
otu1477	0	0	1	0	0	0	11	0	52	49	16	25	0	0	0	0	0	0
otu1478	0	0	1	0	0	0	0	0	0	9	0	0	0	0	193	0	0	3
otu1479	1	0	0	0	91	0	0	0	0	0	0	0	0	0	0	0	0	0
otu1480	0	0	0	1	73	0	19	0	0	0	0	0	0	2	0	0	0	0
otu1481	21	15	2	0	0	0	6	0	0	0	0	0	3	18	5	0	0	0
otu1482	0	0	5	0	0	0	0	0	50	0	0	0	0	0	0	0	0	0
otu1483	0	0	0	0	75	0	0	0	0	0	0	0	0	3	1	0	0	0
otu1484	0	0	0	0	0	0	20	0	0	0	0	0	0	38	0	0	0	0
otu1485	0	0	0	0	0	0	1	2	2	4	0	0	0	2	0	0	0	0
otu1486	0	0	0	0	0	0	35	0	29	12	111	15	0	0	0	0	0	0
otu1487	0	0	0	6	0	0	0	2	1	1	0	0	0	0	0	0	0	0
otu1488	0	0	0	0	0	0	0	0	0	0	0	0	0	20	0	0	0	0
otu1489	0	0	1	0	34	0	0	0	0	0	0	0	0	0	0	0	0	0
otu1490	0	0	0	0	0	0	7	0	0	0	0	0	0	0	0	0	0	0
otu1492	0	8	0	0	0	0	0	28	15	0	0	0	0	0	0	0	0	1
otu1493	0	0	0	13	0	0	0	1	3	0	8	1	1	0	6	0	0	0
otu1494	4	23	7	0	0	0	0	0	0	0	0	0	0	0	0	0	0	0
otu1495	48	0	0	0	0	0	0	0	0	0	0	0	0	0	0	0	0	0
otu1496	0	0	0	24	0	0	0	92	5	0	5	0	43	0	46	0	0	0
otu1497	0	0	0	0	63	0	0	0	0	0	0	0	0	0	0	0	0	0
otu1498	0	0	0	0	0	32	0	0	0	0	0	0	0	0	0	0	0	0
otu1499	0	0	0	0	0	0	0	0	0	0	0	0	82	0	19	0	0	1
otu1500	0	0	0	0	0	0	0	0	0	14	0	0	0	0	0	0	0	0
otu1501	0	0	0	0	0	0	0	0	0	0	0	0	9	0	2	0	0	0
otu1502	0	0	0	0	0	0	2	0	0	0	0	6	0	0	0	0	0	0
otu1503	0	2	104	0	0	0	0	0	0	41	1	42	0	0	0	0	0	0
otu1504	0	1	0	0	44	0	0	0	0	0	0	0	0	0	0	0	0	0
otu1505	0	0	0	0	0	0	0	0	0	0	0	0	82	0	39	0	0	0
otu1506	77	11	6	0	0	0	24	0	47	0	0	15	0	0	0	0	0	0
otu1508	0	0	0	0	0	0	0	0	54	0	0	0	0	0	0	0	0	0
otu1509	0	0	0	0	0	13	0	0	0	0	0	0	0	0	0	0	0	0
otu1510	0	0	0	0	107	0	0	0	0	0	0	0	0	0	0	0	0	0
otu1511	0	0	0	0	0	0	0	0	0	0	0	0	63	0	23	0	0	0
otu1513	0	0	0	0	0	0	0	0	0	0	0	0	0	0	61	0	0	0
otu1514	1	1	0	0	0	0	23	5	7	0	0	1	0	62	0	0	0	0
otu1515	2	3	0	0	68	0	0	0	0	0	0	0	0	0	0	0	0	1
otu1516	0	0	0	0	0	0	0	0	0	74	0	0	0	0	0	0	0	0
otu1517	0	0	0	0	1	12	0	0	0	0	0	0	0	0	0	0	0	0
otu1518	0	0	0	0	14	0	0	0	0	0	0	0	0	0	0	0	0	0
otu1519	0	0	0	0	0	65	0	0	0	0	0	0	0	0	0	0	0	0
otu1520	5	29	13	0	17	0	0	2	0	0	1	0	0	0	0	0	0	0
otu1521	0	0	0	0	0	0	13	0	5	57	8	0	0	0	0	0	0	0
otu1522	0	0	1	0	0	0	3	0	0	10	0	2	0	3	0	0	0	0
otu1523	1	6	0	0	44	2	0	0	0	2	0	25	10	2	2	4	0	52
otu1524	0	0	0	0	0	0	0	0	0	0	111	0	0	0	0	0	0	0
otu1525	1	1	3	0	0	76	19	12	11	0	0	0	0	10	0	0	0	0
otu1526	0	0	0	2	0	0	0	2	0	0	4	1	0	0	0	0	0	0
otu1527	0	17	0	0	0	0	0	0	0	0	0	0	0	0	0	0	0	0
otu1528	0	0	0	0	0	0	0	84	0	0	0	1	0	0	0	0	0	0
otu1529	0	0	2	0	0	0	0	0	0	0	0	0	0	12	0	0	0	0
otu1530	0	0	0	0	0	90	0	0	6	0	0	31	0	3	0	0	0	0
otu1531	0	0	0	0	0	1	5	1	6	3	9	14	0	0	0	0	0	0
otu1532	75	43	2	0	0	0	0	1	0	0	0	0	0	9	0	0	0	0
otu1533	2	0	0	0	15	0	0	0	0	0	0	0	0	0	59	0	0	0
otu1534	0	0	4	0	0	0	58	0	0	0	0	0	0	0	0	0	0	0
otu1535	134	31	0	0	0	0	0	0	0	0	0	0	0	0	0	0	0	0
otu1536	0	0	0	0	0	0	0	0	0	0	0	0	0	53	0	0	0	0
otu1537	1	0	0	0	0	0	0	0	0	0	0	0	0	7	77	0	0	0
otu1538	0	1	0	0	10	0	0	2	0	0	0	0	0	0	0	0	0	0
otu1539	0	23	69	0	0	0	0	0	0	0	0	0	0	0	0	0	0	0
otu1540	0	68	0	0	0	0	0	0	0	0	0	0	0	0	0	0	0	0
otu1541	0	0	1	0	0	0	0	54	0	0	0	0	0	0	0	0	0	0
otu1542	0	1	0	0	45	0	0	19	20	18	0	0	0	0	0	0	0	0
otu1543	0	0	0	0	0	0	1	4	0	23	44	7	0	0	0	0	0	0
otu1544	0	0	0	13	0	2	5	6	27	5	94	8	4	0	5	0	0	0
otu1545	0	0	20	6	0	0	0	0	0	0	0	0	0	0	0	0	0	0
otu1546	0	0	1	0	0	0	1	5	37	6	24	1	11	0	0	0	0	0
otu1547	2	0	11	0	0	0	3	0	0	0	0	0	0	7	46	0	0	0
otu1548	0	0	0	0	0	0	35	0	0	0	0	0	0	0	0	0	0	0
otu1549	3	65	0	0	0	0	0	0	0	0	0	0	0	0	0	0	0	0
otu1550	1	7	0	0	0	5	0	0	0	16	15	2	1	3	0	1	0	8
otu1551	0	0	0	0	0	0	0	110	0	0	0	0	0	0	0	0	0	0
otu1552	0	0	0	0	0	0	0	3	2	10	0	0	0	0	0	0	0	0
otu1553	0	0	0	0	0	0	0	0	0	0	0	0	0	0	57	0	0	0
otu1554	12	0	3	0	16	0	9	0	0	0	0	0	45	0	0	0	0	0
otu1555	0	8	2	0	0	0	0	0	0	0	0	0	0	0	0	0	0	0
otu1556	0	0	0	11	0	4	1	0	0	28	1	25	0	0	0	0	0	0
otu1557	8	1	144	0	0	0	0	0	0	0	0	0	0	0	0	0	0	0
otu1558	0	0	0	0	0	0	16	0	0	0	54	0	17	0	0	0	0	0
otu1559	0	0	0	0	0	0	0	0	0	0	0	0	0	117	0	0	0	0
otu1560	0	0	0	0	0	0	0	0	0	0	0	0	0	0	78	0	0	0
otu1561	0	0	0	0	0	0	0	0	0	0	0	0	139	0	0	0	0	0
otu1562	0	0	0	0	0	0	9	0	0	0	0	0	0	0	0	0	0	0
otu1563	7	0	0	0	35	20	8	0	0	0	0	0	16	6	39	0	0	0
otu1564	0	0	0	0	0	0	0	0	0	0	0	0	0	3	42	0	0	0
otu1566	0	0	0	0	92	0	0	0	0	0	0	0	0	0	0	0	0	0
otu1567	0	0	0	0	0	0	0	0	0	0	0	0	15	0	9	0	0	0
otu1568	0	0	0	0	127	0	0	0	0	0	0	0	0	0	0	0	0	0
otu1569	4	5	0	0	33	0	7	0	0	0	0	0	67	0	0	1	0	0
otu1570	0	1	0	0	17	0	4	9	5	3	0	11	12	4	4	4	2	2
otu1571	0	0	1	26	35	0	0	0	0	0	0	29	0	0	0	0	0	0
otu1572	0	1	0	0	0	0	0	0	11	0	0	0	0	60	0	0	0	0
otu1573	0	8	0	0	0	0	0	0	0	0	0	0	0	0	0	0	0	0
otu1574	0	0	4	0	0	0	5	0	50	0	0	0	0	0	0	0	0	0
otu1575	0	0	0	0	1	0	26	30	39	0	105	12	0	0	0	0	0	0
otu1576	0	0	0	0	0	0	0	0	0	7	0	26	0	0	0	0	0	0
otu1577	0	0	0	0	0	0	0	0	0	0	0	197	0	0	0	0	0	0
otu1578	0	0	1	0	0	0	0	6	37	15	0	38	0	0	0	0	0	0
otu1579	0	0	0	0	6	10	0	0	0	0	0	0	0	0	0	0	0	0
otu1580	0	0	0	0	0	0	0	0	3	3	0	2	0	0	2	0	0	0
otu1581	0	0	10	0	0	0	0	3	0	0	0	0	8	14	30	0	0	0
otu1582	0	0	0	0	0	0	0	16	0	51	0	0	0	0	0	0	0	0
otu1583	0	0	0	0	0	0	0	0	0	0	0	0	99	0	0	0	0	0
otu1584	0	0	0	0	0	0	0	0	0	0	0	0	115	0	0	0	0	0
otu1585	0	0	3	60	0	1	1	3	10	6	28	7	10	0	5	0	0	0
otu1586	0	0	0	17	0	0	0	0	0	0	0	0	0	0	0	0	0	0
otu1587	0	0	0	78	0	0	0	0	0	0	0	0	0	0	0	0	0	0
otu1588	0	0	0	71	0	0	0	0	1	0	0	0	0	0	0	0	0	0
otu1590	110	21	0	0	0	0	0	0	0	0	0	0	0	0	0	0	0	0
otu1591	0	0	0	0	0	0	37	0	0	0	0	0	0	0	0	0	0	0
otu1592	0	0	0	0	155	0	0	0	0	0	0	0	0	0	0	0	0	0
otu1593	0	0	0	0	0	0	0	24	29	81	0	0	0	0	0	0	0	0
otu1595	0	47	5	0	0	0	0	0	0	95	0	0	0	0	0	0	0	0
otu1596	0	0	0	0	0	0	0	0	0	0	0	63	0	0	0	0	0	0
otu1597	0	0	0	0	0	0	0	0	102	0	0	0	0	0	0	0	0	0
otu1598	0	2	7	0	0	0	33	0	57	0	0	0	0	0	0	0	0	0
otu1599	83	13	0	0	0	0	0	0	0	0	0	0	1	0	0	0	0	0
otu1600	0	0	0	0	0	0	0	0	0	0	0	31	0	0	0	0	0	0
otu1601	0	0	0	0	0	0	0	0	0	0	0	0	78	0	0	0	0	0
otu1602	0	0	0	0	0	0	0	3	12	0	0	0	0	0	0	0	0	0
otu1603	0	0	0	6	0	0	2	3	11	3	48	0	1	0	3	0	0	0
otu1604	0	0	0	0	0	0	0	0	13	0	0	0	0	0	0	0	0	0
otu1605	32	8	98	0	0	0	0	0	0	0	0	0	0	0	0	0	0	0
otu1606	0	2	2	0	5	0	1	1	1	0	0	3	83	0	3	0	0	1
otu1607	0	0	0	0	0	0	1	5	3	2	0	0	0	0	0	0	0	0
otu1608	0	0	0	0	0	0	0	0	0	122	0	0	0	0	0	0	0	0
otu1609	0	0	0	0	0	0	0	0	0	79	0	0	0	0	0	0	0	0
otu1610	0	0	0	0	53	0	0	0	0	0	0	0	0	0	0	0	0	0
otu1611	0	0	0	0	10	0	3	0	0	0	0	0	0	30	0	0	0	0
otu1612	0	0	0	0	0	0	1	1	11	13	92	1	2	0	0	0	0	0
otu1613	0	0	0	0	0	67	0	0	0	0	0	0	0	0	0	0	0	0
otu1614	0	0	0	0	0	0	0	0	0	0	0	1	0	31	51	0	0	0
otu1615	0	0	0	0	0	0	0	0	0	0	0	0	85	0	0	0	0	0
otu1616	3	2	11	0	0	0	0	0	6	0	0	0	42	21	0	0	0	0
otu1617	0	0	0	0	0	0	3	0	11	0	0	104	0	0	0	0	0	0
otu1618	0	0	0	0	0	0	0	0	0	0	30	33	0	0	0	0	0	0
otu1619	1	0	9	0	0	0	0	0	0	0	0	0	0	1	0	0	0	0
otu1620	0	0	0	33	0	89	0	0	0	0	0	0	0	0	0	0	0	0
otu1621	0	0	0	0	0	10	0	0	0	0	0	0	0	0	0	0	0	0
otu1622	0	0	0	0	0	1	0	13	69	0	0	0	0	0	0	0	0	0
otu1623	0	0	0	0	6	8	0	0	0	0	0	0	0	0	0	0	0	0
otu1624	0	0	0	0	0	0	4	0	2	0	3	48	0	0	0	0	0	0
otu1625	0	0	2	0	0	0	27	81	0	0	0	0	0	0	0	0	0	0
otu1626	0	0	0	0	0	0	0	126	0	0	0	0	0	0	0	0	0	0
otu1627	0	0	0	0	0	0	0	0	0	0	0	0	8	0	1	0	0	0
otu1628	0	0	0	0	0	0	0	0	0	0	0	0	8	85	0	0	0	0
otu1629	0	0	0	0	0	0	0	0	0	0	0	84	0	0	0	0	0	0
otu1630	6	5	1	0	0	0	0	0	0	0	0	0	0	0	0	0	0	0
otu1631	16	0	0	0	0	0	0	0	30	7	2	0	22	0	0	0	0	0
otu1632	24	0	0	0	0	0	0	17	0	0	0	0	0	0	0	0	0	0
otu1633	33	52	0	0	0	0	0	0	0	0	0	0	0	0	0	0	0	0
otu1634	0	0	0	12	45	0	0	7	0	0	0	0	0	46	27	0	0	0
otu1635	58	0	0	0	0	0	0	0	0	0	0	0	0	0	0	0	0	0
otu1636	0	0	0	67	0	1	0	0	0	1	0	94	5	0	6	0	0	0
otu1637	0	0	0	0	0	0	0	0	0	104	0	0	0	0	0	0	0	0
otu1638	0	0	0	0	61	0	0	0	0	0	0	0	0	0	0	0	0	0
otu1639	0	28	22	0	0	29	0	20	11	0	1	0	0	0	0	0	0	1
otu1640	0	0	0	0	0	0	0	0	0	0	0	0	106	0	0	0	0	0
otu1641	0	4	3	0	0	0	0	4	0	0	0	0	0	0	81	1	0	3
otu1642	0	0	0	0	0	0	0	0	7	0	0	0	0	0	49	0	0	0
otu1643	0	0	136	0	0	0	0	0	0	10	0	0	0	0	0	0	0	0
otu1644	0	0	0	6	0	0	0	0	5	0	0	0	0	0	0	0	0	0
otu1645	133	7	0	0	0	0	0	0	0	0	0	0	0	0	0	0	0	0
otu1646	0	0	0	0	0	0	0	0	0	0	0	0	0	0	10	0	0	0
otu1647	0	1	5	0	0	0	0	117	11	0	0	0	0	6	0	0	0	0
otu1648	0	0	0	0	1	7	0	0	0	0	0	0	0	0	0	0	0	0
otu1649	0	0	1	0	0	0	0	0	3	0	0	0	2	4	4	0	0	0
otu1650	0	0	0	0	0	0	0	0	0	86	0	0	0	10	0	0	0	0
otu1651	0	3	0	0	0	0	0	0	70	0	0	0	0	0	0	0	0	0
otu1652	0	0	0	0	0	0	10	0	0	0	0	0	0	43	0	0	0	0
otu1653	0	0	0	0	0	0	0	0	0	0	0	0	18	26	24	0	0	0
otu1654	1	5	2	0	0	0	56	0	0	0	0	0	0	0	0	0	0	0
otu1655	0	0	133	0	0	0	0	0	0	0	0	0	0	0	0	7	0	0
otu1656	0	0	0	0	0	0	13	0	2	0	0	0	0	0	0	0	0	0
otu1657	0	0	0	0	0	0	0	3	61	0	0	0	0	1	0	0	0	0
otu1658	0	0	0	0	0	0	0	0	0	0	0	0	0	0	45	0	0	0
otu1659	32	58	114	0	0	0	0	0	0	0	0	0	0	0	0	0	0	0
otu1660	0	3	5	0	0	0	0	0	15	97	6	0	0	11	0	0	0	0
otu1661	0	0	0	0	0	0	0	0	0	118	0	0	0	0	0	0	0	0
otu1662	0	0	0	0	0	0	53	0	0	0	0	0	0	0	0	0	0	0
otu1663	0	0	104	0	0	0	0	0	0	0	0	0	0	0	0	0	0	0
otu1664	0	0	0	12	0	0	0	0	0	0	0	0	0	0	0	0	0	0
otu1665	0	0	0	0	86	0	0	0	0	0	0	0	0	0	0	0	0	0
otu1666	0	3	0	0	0	0	0	0	0	0	0	0	0	6	0	0	0	0
otu1667	0	0	0	0	0	0	0	0	0	49	0	2	0	0	0	0	0	0
otu1668	0	0	0	0	0	0	0	1	3	2	36	0	0	0	0	0	0	0
otu1669	0	0	0	0	0	0	0	0	21	0	5	0	0	0	0	0	0	0
otu1670	0	0	0	0	0	0	0	0	0	0	107	9	0	0	0	0	0	0
otu1671	0	0	0	0	0	4	0	0	0	0	6	0	0	0	0	0	0	0
otu1672	9	0	0	0	0	4	0	0	0	0	0	0	1	0	0	0	0	0
otu1673	0	0	100	0	0	0	0	0	0	0	0	0	0	0	0	0	0	0
otu1674	1	8	0	0	0	0	0	0	0	0	0	0	0	0	0	0	0	0
otu1675	0	0	0	0	0	0	0	0	9	0	0	0	0	0	0	0	0	0
otu1676	0	0	0	0	0	0	0	0	0	137	4	0	0	0	0	0	0	0
otu1677	0	0	0	1	0	0	2	10	56	0	5	38	4	0	6	0	0	0
otu1678	0	9	5	0	0	0	0	0	0	0	0	0	0	0	0	0	0	0
otu1679	0	0	0	0	0	0	0	0	0	0	0	0	80	0	0	0	0	0
otu1680	0	0	0	0	0	94	0	0	0	0	0	0	0	0	0	0	0	0
otu1682	0	0	0	0	0	0	0	2	0	1	0	0	0	0	7	0	0	0
otu1683	0	0	0	0	0	0	0	0	0	9	0	0	0	0	0	0	0	0
otu1684	0	0	0	0	0	0	0	1	0	12	0	0	0	0	0	0	0	0
otu1685	96	24	0	0	0	0	0	0	0	0	0	0	0	0	0	0	0	0
otu1686	0	0	0	0	0	0	0	0	5	0	9	0	0	0	0	0	0	0
otu1687	0	0	0	0	0	0	0	9	24	14	18	29	6	0	0	0	0	0
otu1688	94	47	0	0	0	0	0	0	0	0	0	0	0	0	0	0	0	0
otu1689	1	0	2	0	0	0	2	4	0	0	1	0	0	0	1	0	0	0
otu1690	0	0	0	0	0	0	6	0	0	0	0	33	0	0	0	0	0	0
otu1691	0	0	0	0	0	81	0	0	0	0	0	0	0	0	0	0	0	0
otu1692	0	0	0	0	0	0	0	7	0	0	24	0	0	1	33	0	0	0
otu1693	0	0	0	0	57	0	0	0	0	0	0	0	0	0	0	0	0	0
otu1694	0	0	0	22	0	0	0	0	0	0	1	0	0	0	0	0	0	0
otu1695	0	41	0	0	0	0	0	0	0	0	0	0	0	0	0	0	0	0
otu1696	0	0	0	0	138	0	0	0	0	0	0	0	0	0	0	0	0	0
otu1697	0	0	0	0	0	0	0	0	0	0	0	84	0	0	0	0	0	0
otu1698	0	0	0	0	0	0	0	60	0	0	0	0	0	0	0	0	0	0
otu1699	0	0	0	0	1	0	0	0	0	0	0	0	8	3	0	0	0	0
otu1700	0	0	0	0	0	1	0	0	1	0	0	5	2	0	0	0	0	0
otu1701	0	0	0	72	1	0	0	0	0	0	0	0	0	0	0	0	0	0
otu1702	0	0	0	0	0	0	0	0	0	0	0	0	87	0	57	0	0	0
otu1703	0	0	0	0	0	0	0	0	0	0	0	0	0	0	68	0	0	0
otu1704	2	0	0	11	0	0	0	10	28	32	0	0	12	4	0	0	0	0
otu1705	91	0	0	0	0	0	0	0	0	0	0	0	28	0	0	0	0	0
otu1706	1	0	0	0	0	0	0	62	0	0	0	0	0	1	0	0	0	0
otu1708	0	0	0	0	72	0	0	0	0	0	0	2	0	0	0	0	0	0
otu1709	0	0	0	0	9	44	0	0	0	0	0	0	0	0	0	0	0	0
otu1710	0	0	0	106	0	0	0	0	0	0	0	0	0	0	0	0	0	0
otu1711	0	0	0	43	0	0	6	5	0	2	41	3	6	0	2	0	0	0
otu1712	0	0	0	0	0	0	0	6	1	0	0	0	0	2	0	0	0	0
otu1713	0	0	0	0	0	9	0	0	0	0	0	0	0	0	0	0	0	0
otu1714	0	0	0	0	0	0	0	0	0	0	1	26	0	0	0	0	0	0
otu1715	0	11	0	0	0	0	0	0	0	0	0	0	0	0	0	0	0	0
otu1716	0	0	1	14	0	0	3	82	3	0	12	0	0	4	0	0	1	0
otu1717	7	5	0	0	0	0	0	0	0	0	0	0	0	0	0	0	0	0
otu1718	2	2	71	0	0	0	0	0	0	0	0	0	0	0	0	0	0	0
otu1719	28	2	0	0	34	0	0	0	0	0	0	0	0	0	0	0	0	0
otu1720	0	0	0	0	0	0	0	0	0	4	0	5	0	0	0	0	0	0
otu1721	1	2	0	0	0	0	8	0	0	26	0	0	0	7	0	0	0	0
otu1722	1	1	0	0	27	1	0	0	0	0	0	10	1	2	0	0	0	0
otu1723	1	0	0	0	0	0	0	73	0	0	0	0	0	0	0	0	0	0
otu1724	0	0	0	0	0	62	0	0	0	0	0	0	0	0	0	0	0	0
otu1725	0	0	0	2	0	0	4	6	19	5	106	10	1	0	1	0	0	0
otu1726	0	165	0	0	0	0	0	0	0	0	0	0	0	0	0	0	0	0
otu1727	0	0	0	0	0	0	0	0	0	81	0	0	0	0	0	0	0	0
otu1728	0	0	0	0	0	0	0	0	28	0	0	0	0	0	0	0	0	0
otu1729	0	0	0	2	0	3	9	10	5	3	7	26	5	0	11	0	0	0
otu1730	0	0	0	0	0	0	0	0	1	0	29	0	0	0	0	0	0	0
otu1731	1	3	6	0	0	0	11	2	79	0	0	0	0	0	0	0	0	0
otu1732	0	0	0	0	0	0	0	0	1	0	5	0	0	0	0	0	0	0
otu1733	0	0	0	0	0	0	0	0	0	34	0	0	0	0	0	0	0	0
otu1734	0	0	93	0	0	0	0	0	18	2	0	0	0	0	0	4	0	1
otu1735	0	0	0	0	0	0	0	0	0	46	38	21	0	0	0	0	0	0
otu1736	0	0	0	37	0	0	0	0	0	0	0	0	7	0	0	0	0	0
otu1737	0	0	0	0	0	0	1	1	14	22	27	6	1	0	3	0	0	0
otu1738	0	0	0	0	0	0	25	0	0	0	0	0	0	0	0	0	0	0
otu1739	0	0	0	0	0	0	0	1	0	14	0	0	0	0	0	0	0	0
otu1741	0	0	0	0	0	0	0	0	0	42	0	0	0	0	0	0	0	0
otu1742	0	0	0	0	7	0	0	0	0	0	0	0	0	0	0	0	0	0
otu1743	0	0	0	0	0	0	0	0	0	0	0	0	0	0	51	0	0	0
otu1744	0	0	0	0	0	0	0	79	0	0	0	0	0	0	0	0	0	0
otu1745	0	0	0	0	0	0	0	0	0	0	0	0	107	0	0	0	0	0
otu1746	1	0	0	0	0	0	0	0	0	0	0	0	48	0	0	0	0	0
otu1747	0	0	0	0	0	0	0	4	0	0	21	0	0	0	0	0	0	0
otu1748	13	77	26	6	0	0	0	0	0	0	0	0	0	0	0	0	0	0
otu1749	0	0	0	0	0	0	0	0	0	0	0	10	0	1	0	0	0	0
otu1750	0	0	0	0	0	0	0	48	22	28	0	0	0	0	0	0	0	0
otu1751	0	0	0	0	0	0	74	36	17	0	0	0	0	0	0	0	0	0
otu1752	0	0	0	0	0	0	0	0	0	0	0	7	0	0	0	0	0	0
otu1753	0	0	0	0	0	0	12	0	7	0	0	0	60	6	47	0	0	0
otu1754	0	2	0	0	0	0	0	0	83	0	0	0	0	0	0	0	0	0
otu1755	1	3	5	0	0	0	0	0	0	0	0	0	0	0	0	0	0	0
otu1756	0	0	0	0	0	0	0	0	0	0	0	0	1	133	0	0	0	0
otu1757	0	0	0	0	0	0	0	0	2	0	21	0	0	0	0	0	0	0
otu1758	0	0	0	0	7	0	0	0	0	0	0	0	0	0	0	0	0	0
otu1759	0	0	4	0	0	1	20	23	31	7	2	36	15	0	5	2	0	0
otu1760	0	0	0	0	0	0	0	0	0	0	0	0	30	0	0	0	0	0
otu1761	0	0	0	0	0	0	4	32	0	0	0	0	0	0	0	0	0	0
otu1762	0	0	0	0	0	0	0	0	0	0	0	0	30	0	0	0	0	0
otu1763	0	0	0	0	0	0	0	0	27	0	0	0	0	0	0	0	0	0
otu1764	5	0	1	0	0	0	0	0	0	0	0	0	39	0	0	0	0	0
otu1765	0	0	0	0	0	0	0	0	0	13	0	0	0	0	0	0	0	0
otu1766	0	0	0	0	1	0	2	0	0	0	0	0	3	1	0	1	0	0
otu1767	0	0	0	1	0	0	0	0	1	1	0	76	0	0	0	0	0	0
otu1768	0	0	0	0	0	0	0	54	0	0	10	0	0	0	0	0	0	0
otu1769	0	0	1	0	0	10	1	1	1	0	0	0	0	2	0	0	0	0
otu1770	0	0	0	0	0	0	12	10	20	3	26	117	6	0	4	0	0	0
otu1771	0	0	0	0	0	0	0	0	0	12	0	0	0	0	0	0	0	0
otu1772	0	0	0	0	71	0	0	0	0	0	0	0	0	0	0	0	0	0
otu1773	0	0	0	0	54	0	0	0	0	0	0	0	0	0	0	0	0	0
otu1774	0	0	0	0	74	17	0	0	0	0	0	0	0	0	0	0	0	0
otu1775	0	3	0	0	0	9	1	0	0	0	0	0	81	4	9	0	0	0
otu1776	0	0	84	0	0	0	0	0	0	0	0	0	0	0	0	0	0	0
otu1777	0	0	0	0	0	0	0	0	0	0	0	0	0	0	104	0	0	0
otu1778	0	0	0	0	0	0	0	76	1	0	0	0	0	0	0	0	0	0
otu1779	8	2	65	0	0	0	0	0	0	0	0	0	0	0	0	0	0	0
otu1780	0	0	0	0	0	0	0	0	10	42	0	0	0	0	0	0	0	0
otu1781	1	0	0	0	0	0	0	2	3	0	0	0	0	0	1	0	0	0
otu1782	0	0	0	5	0	0	0	0	0	4	11	23	15	0	5	0	0	0
otu1783	41	51	0	0	0	0	0	0	0	0	0	0	0	0	0	0	0	0
otu1784	0	0	20	0	0	0	0	0	0	0	0	0	0	0	0	0	0	0
otu1786	0	0	0	0	0	0	34	19	0	0	0	0	0	0	0	0	0	0
otu1787	6	9	0	0	0	0	6	58	16	0	37	0	0	8	0	0	0	1
otu1788	0	0	0	0	0	0	0	32	0	0	0	0	0	9	0	0	0	0
otu1789	10	51	0	0	0	0	0	0	0	0	0	0	0	23	23	0	0	0
otu1790	8	123	0	0	0	0	0	0	0	0	0	0	0	0	0	0	0	0
otu1791	0	0	0	0	0	0	0	0	0	0	0	6	0	0	0	0	0	0
otu1792	6	171	0	0	0	0	0	0	0	0	0	0	0	0	0	0	0	0
otu1793	16	0	0	0	0	0	0	0	0	0	0	0	2	0	0	0	0	0
otu1794	0	0	0	0	0	0	0	0	0	52	0	0	0	0	0	0	0	0
otu1795	32	12	0	0	1	0	0	0	0	0	0	0	0	37	10	0	0	0
otu1796	0	105	0	0	0	0	0	0	0	0	0	0	0	0	0	0	0	0
otu1797	0	0	0	0	0	0	0	0	0	0	0	0	0	12	0	0	0	0
otu1798	0	0	0	0	0	0	0	0	0	21	0	0	0	0	0	0	0	0
otu1799	0	0	0	0	0	0	0	1	1	0	3	3	0	0	0	0	0	0
otu1800	2	1	0	0	0	0	0	17	0	0	15	11	0	0	0	2	0	4
otu1801	0	0	0	0	0	0	0	0	2	27	0	0	0	0	0	0	0	0
otu1802	0	0	0	0	0	0	52	0	0	0	0	0	0	0	0	0	0	0
otu1803	0	3	41	0	0	0	0	0	0	0	0	0	0	0	0	0	0	0
otu1804	0	0	0	0	0	67	0	0	0	0	0	0	0	0	0	0	0	0
otu1805	0	1	1	0	0	0	1	0	0	1	0	0	0	3	0	0	0	0
otu1806	0	73	0	0	0	0	0	0	0	0	0	0	0	0	0	0	0	0
otu1807	0	0	0	0	0	0	0	0	0	0	51	0	0	0	0	0	0	0
otu1808	0	0	0	0	0	34	0	1	0	0	0	0	0	0	0	0	0	0
otu1809	0	0	0	0	0	2	16	14	14	3	0	22	18	0	11	0	0	0
otu1810	0	0	1	0	0	0	1	0	8	0	0	0	0	0	0	0	0	0
otu1811	1	1	0	0	0	0	0	0	0	0	0	0	14	68	93	0	0	0
otu1812	0	0	0	0	0	0	0	0	0	0	0	0	0	0	91	0	0	0
otu1813	0	0	1	0	0	0	0	0	13	31	0	0	0	0	0	1	0	0
otu1814	0	0	6	0	0	0	0	0	0	22	8	13	0	0	0	0	0	0
otu1815	0	0	0	0	0	0	0	0	0	0	0	0	0	81	0	0	0	0
otu1816	0	0	0	0	0	40	0	0	0	0	0	0	0	0	0	0	0	0
otu1817	0	0	0	0	0	0	0	38	5	0	0	0	0	0	0	0	0	0
otu1819	9	6	0	0	0	0	0	0	0	0	0	0	0	0	0	0	0	0
otu1821	1	66	0	0	0	0	0	0	0	0	0	0	0	4	0	0	1	0
otu1822	0	2	1	0	0	0	0	58	21	2	13	0	0	0	0	0	0	0
otu1823	0	0	0	0	0	59	0	33	1	0	1	17	0	0	0	0	0	0
otu1825	66	2	0	0	1	0	0	0	2	0	0	0	0	11	0	0	1	0
otu1826	0	0	0	0	0	86	0	0	0	0	0	0	0	0	0	0	0	0
otu1827	0	0	0	0	0	8	0	0	0	0	0	0	0	0	0	0	0	0
otu1828	0	0	0	0	8	0	0	0	0	0	0	0	0	0	0	0	0	0
otu1829	1	5	0	0	24	0	0	0	6	28	0	0	6	0	0	0	0	0
otu1830	0	0	0	0	0	1	11	3	5	0	0	7	3	0	0	0	0	0
otu1831	0	0	2	0	0	0	0	0	5	0	0	0	87	0	0	0	0	0
otu1832	42	38	0	0	0	0	0	0	0	0	0	0	0	0	0	0	0	0
otu1833	0	0	0	0	0	0	62	0	0	0	0	0	0	0	0	0	0	0
otu1834	24	21	59	0	0	0	0	0	0	0	0	0	0	0	0	0	0	0
otu1835	0	0	0	0	0	0	0	0	0	0	0	0	0	0	25	0	0	0
otu1836	0	0	0	0	0	0	36	0	0	0	0	0	0	0	0	0	0	0
otu1837	17	23	8	0	0	0	0	0	0	0	0	0	0	0	0	0	0	0
otu1839	0	0	0	14	0	0	1	1	0	1	12	1	1	0	0	0	0	0
otu1840	1	1	5	0	0	3	2	3	16	3	0	0	19	9	5	2	1	0
otu1841	8	40	3	0	0	0	0	0	0	0	0	0	0	0	0	0	0	0
otu1843	0	0	0	0	9	0	4	0	0	0	4	0	0	0	0	0	0	0
otu1844	0	0	0	0	0	112	0	0	0	0	0	0	0	0	0	0	0	0
otu1845	37	32	0	0	0	0	0	0	0	0	0	0	0	0	0	0	0	0
otu1846	0	0	0	0	0	0	0	0	0	0	41	0	0	0	0	0	0	0
otu1847	18	0	0	0	0	0	0	0	0	0	0	0	0	0	0	0	0	0
otu1848	0	0	0	0	0	5	3	1	0	0	0	0	0	2	0	0	0	0
otu1849	0	0	0	0	0	0	0	0	0	0	0	10	0	0	0	0	0	0
otu1850	18	9	0	57	7	0	0	0	0	0	0	0	1	0	0	0	0	0
otu1851	2	0	4	0	6	1	1	1	2	0	0	4	4	1	1	5	13	6
otu1852	4	7	3	0	0	1	6	4	9	3	3	8	6	0	6	1	0	1
otu1853	0	0	0	0	0	0	0	8	43	0	0	0	0	0	0	0	0	0
otu1854	0	0	1	0	0	0	70	0	0	0	0	0	0	0	0	0	0	0
otu1855	0	2	0	0	0	0	0	15	0	0	0	0	0	0	0	1	0	0
otu1856	0	0	0	0	0	0	0	0	0	73	0	0	0	0	0	0	0	0
otu1857	0	0	0	0	58	0	0	0	0	0	0	0	0	0	0	0	0	0
otu1858	18	21	0	0	0	0	0	0	0	0	0	0	0	0	0	0	0	1
otu1859	75	2	0	0	0	0	0	0	0	0	0	0	0	0	0	0	0	0
otu1860	0	0	0	0	0	0	0	0	0	11	0	0	53	5	23	1	1	0
otu1861	0	0	3	0	48	39	0	0	0	0	0	0	0	2	0	0	0	0
otu1862	0	0	0	0	0	52	0	0	0	0	0	0	0	0	0	0	0	0
otu1863	2	2	7	0	19	0	0	0	0	0	0	0	0	2	0	0	0	0
otu1864	18	0	0	0	0	0	0	0	0	0	0	0	0	0	0	0	0	0
otu1865	0	0	13	0	0	0	0	12	53	26	0	0	0	6	0	0	0	0
otu1866	0	0	0	0	0	0	0	0	3	0	1	1	3	0	1	0	0	0
otu1867	0	0	0	0	0	0	5	0	0	0	0	27	0	0	0	0	0	0
otu1868	0	0	0	0	8	0	7	0	0	0	4	0	0	0	0	0	0	0
otu1869	0	0	0	0	0	0	0	0	0	0	0	0	7	0	0	0	0	0
otu1870	0	0	0	0	0	0	0	5	0	4	10	0	0	0	0	0	0	0
otu1871	0	0	2	0	0	1	9	6	5	1	0	17	10	0	8	0	0	0
otu1872	0	2	0	2	1	0	1	0	0	7	6	31	113	1	9	0	0	0
otu1873	0	1	2	0	0	0	2	0	0	0	0	0	0	2	0	0	0	0
otu1874	0	0	0	0	0	0	52	1	0	0	0	0	0	0	0	0	0	0
otu1875	0	0	0	0	0	0	0	0	0	0	0	0	1	64	0	0	0	0
otu1876	0	0	0	0	0	0	0	0	0	14	0	0	0	2	36	0	0	0
otu1877	0	0	0	0	0	0	0	0	0	0	0	0	79	5	0	0	0	0
otu1878	0	0	0	0	0	0	0	0	16	46	0	0	0	0	0	0	0	0
otu1879	0	0	0	0	0	0	0	20	0	0	0	0	0	0	0	0	0	0
otu1880	0	0	0	1	0	0	0	0	0	0	0	0	6	0	0	0	0	0
otu1881	0	0	0	130	0	1	0	0	0	0	1	0	0	0	0	0	0	0
otu1882	0	0	0	8	1	0	0	0	0	0	0	0	0	0	0	0	0	0
otu1883	0	0	0	0	0	24	0	0	0	19	0	0	0	0	0	0	0	0
otu1884	0	54	0	0	0	0	0	0	0	0	0	0	0	0	0	0	0	0
otu1885	0	0	0	0	0	0	0	13	0	0	12	0	41	0	0	0	0	0
otu1886	9	56	11	0	0	0	0	0	14	9	0	0	0	0	0	0	0	0
otu1887	0	0	1	0	8	0	0	0	0	0	0	0	0	0	0	0	0	0
otu1888	0	0	1	0	0	0	35	0	0	0	0	0	0	0	0	0	0	0
otu1889	0	0	94	0	0	0	0	0	0	0	0	0	0	0	0	0	0	0
otu1890	0	0	0	1	3	1	0	0	0	0	0	0	1	0	1	0	0	0
otu1891	7	6	0	0	0	0	0	0	0	0	0	0	0	0	0	0	0	0
otu1892	0	0	0	0	0	0	0	0	0	0	0	0	27	0	0	0	0	0
otu1893	0	0	0	0	0	0	1	0	0	0	0	5	2	0	3	0	0	0
otu1894	0	2	4	0	0	0	0	0	0	0	0	0	0	0	2	0	0	0
otu1895	0	1	11	0	0	0	15	6	0	17	0	23	0	5	0	0	0	0
otu1896	0	0	0	0	0	0	0	0	0	0	0	0	132	0	0	0	0	0
otu1897	46	151	0	0	0	0	0	0	0	0	0	0	0	0	0	0	0	0
otu1898	1	11	6	0	44	1	0	15	7	4	0	3	16	27	12	6	1	4
otu1899	0	0	11	0	0	0	0	0	0	0	0	0	0	0	0	0	0	0
otu1900	0	0	1	0	0	0	8	9	2	10	86	0	0	0	0	0	0	0
otu1902	87	25	0	0	0	0	0	0	0	0	0	0	0	0	0	0	0	0
otu1903	0	0	0	0	28	0	0	0	0	0	0	0	0	0	0	0	0	0
otu1904	0	0	0	1	70	0	0	0	0	0	0	0	0	0	0	0	0	0
otu1905	0	0	0	0	34	0	0	0	0	0	0	0	0	0	0	0	0	0
otu1906	0	0	0	0	0	0	0	0	86	0	0	0	0	0	0	0	0	0
otu1907	0	0	0	0	0	0	0	0	0	0	0	0	89	0	0	0	0	0
otu1908	0	0	0	0	0	58	0	0	0	0	0	0	0	0	0	0	0	0
otu1909	0	0	0	0	7	0	0	0	0	0	0	0	0	6	0	0	0	0
otu1910	0	0	0	0	0	0	15	19	0	0	0	0	0	3	30	0	0	0
otu1911	46	21	177	0	0	0	0	0	0	0	0	0	0	0	0	0	0	0
otu1912	0	0	0	0	0	8	0	0	0	0	0	0	0	0	0	0	0	0
otu1913	0	0	0	0	0	2	0	0	0	0	0	0	15	0	0	0	0	0
otu1914	11	0	0	0	0	0	0	0	0	0	0	0	0	0	0	0	0	0
otu1915	0	0	0	0	0	0	0	0	0	0	14	0	0	0	0	0	0	0
otu1916	1	0	0	0	33	0	0	0	0	0	0	1	0	0	0	0	0	0
otu1917	0	0	0	0	0	6	0	0	0	1	0	0	2	0	0	0	0	0
otu1918	0	0	0	0	0	0	0	0	0	9	0	0	0	0	0	0	0	0
otu1919	0	0	0	0	0	0	0	0	51	0	0	0	0	0	0	0	0	0
otu1920	0	0	0	0	0	0	1	5	16	13	72	1	0	0	1	0	0	0
otu1921	0	0	0	0	0	72	0	16	10	0	0	0	0	0	0	0	0	0
otu1922	0	0	0	0	0	0	0	0	0	16	59	4	0	0	0	0	0	0
otu1923	0	0	0	0	0	0	18	19	3	37	41	0	93	0	0	0	0	0
otu1924	3	0	1	0	0	0	53	43	5	0	0	0	0	6	0	0	0	0
otu1925	0	0	2	1	0	6	4	10	10	1	51	20	10	0	6	0	0	0
otu1926	0	0	0	34	0	0	0	0	0	0	0	0	0	0	0	134	5	0
otu1927	0	0	0	0	0	0	0	0	0	0	0	0	60	0	0	0	0	0
otu1928	0	0	0	0	0	0	7	0	0	0	0	0	0	22	0	0	0	0
otu1929	0	0	0	0	0	10	0	0	0	0	0	0	0	0	0	0	0	0
otu1930	0	0	0	0	0	0	0	0	0	0	0	0	0	26	0	0	0	0
otu1931	0	0	0	0	0	0	26	0	0	0	0	0	0	0	0	0	0	0
otu1932	0	0	0	0	0	32	0	0	0	42	0	24	0	0	0	0	0	0
otu1933	3	1	0	0	0	0	0	0	22	0	0	0	18	0	0	0	0	0
otu1934	0	0	0	0	0	74	0	0	0	0	0	0	0	0	0	0	0	0
otu1935	0	0	0	0	1	2	18	21	18	3	2	34	10	1	0	0	0	0
otu1936	0	0	0	0	0	0	0	0	0	0	72	0	0	0	0	0	0	0
otu1937	0	0	0	0	0	0	0	0	0	0	0	0	70	0	0	0	0	0
otu1938	3	12	0	0	0	0	0	0	0	0	0	0	0	0	0	0	0	0
otu1939	0	0	0	0	0	0	0	1	0	0	4	0	0	1	13	0	0	0
otu1940	0	0	2	0	0	0	0	0	20	20	19	6	1	1	2	0	0	0
otu1942	0	0	0	0	0	0	0	0	0	0	4	0	0	44	0	0	0	0
otu1943	0	0	0	4	0	0	0	0	7	5	0	0	4	0	0	0	0	0
otu1944	0	0	0	0	0	0	1	1	3	14	56	0	0	0	2	0	0	0
otu1945	0	0	0	0	150	0	0	0	0	0	0	0	0	0	1	0	0	0
otu1946	0	0	0	0	0	13	0	0	0	0	0	0	0	0	0	0	0	0
otu1947	0	0	0	0	0	0	0	0	0	0	0	0	0	0	15	0	0	0
otu1948	43	0	6	0	0	0	0	0	48	0	0	0	0	0	0	0	0	0
otu1949	0	0	0	0	0	0	0	0	8	0	0	0	0	0	0	0	0	0
otu1950	3	2	4	0	0	0	0	0	0	0	0	0	0	0	0	0	0	0
otu1951	0	0	1	0	20	0	0	0	0	0	0	9	4	2	0	0	0	2
otu1952	0	0	5	0	0	0	13	10	7	0	0	34	0	0	0	0	0	0
otu1953	0	0	0	6	0	0	0	0	1	0	0	0	0	0	1	0	0	0
otu1955	0	0	0	0	0	0	0	0	0	0	0	0	1	0	64	0	0	0
otu1956	0	1	0	2	0	0	0	1	0	2	0	0	1	9	4	0	0	0
otu1957	0	4	3	0	11	1	10	12	6	1	1	8	8	7	6	8	5	8
otu1958	0	0	0	0	0	0	0	32	0	0	0	0	0	0	0	0	0	0
otu1959	0	0	0	0	0	7	0	0	0	0	0	0	0	0	0	0	0	0
otu1960	0	0	9	0	0	0	0	0	0	0	0	0	0	0	0	0	0	0
otu1961	0	11	1	0	0	0	0	0	0	0	0	0	0	0	0	0	0	0
otu1962	0	4	0	75	0	0	0	0	0	22	0	0	0	0	0	0	0	0
otu1963	0	0	0	46	22	5	0	0	0	2	0	11	3	0	0	0	0	0
otu1964	0	0	0	10	17	1	0	0	0	0	0	1	0	0	0	0	0	0
otu1965	0	2	0	0	0	0	0	0	18	0	0	0	0	40	0	0	0	0
otu1966	0	54	1	0	29	0	0	0	0	0	0	0	0	2	0	0	0	0
otu1967	0	0	0	0	0	0	1	0	0	0	0	0	0	7	0	0	0	0
otu1968	0	0	0	0	0	0	12	0	0	0	0	0	0	0	0	0	0	0
otu1969	0	0	2	0	0	0	0	0	13	0	0	0	0	0	0	0	0	0
otu1970	0	0	0	0	0	0	0	0	0	7	90	0	0	0	0	0	0	0
otu1971	0	1	3	0	0	0	18	5	18	0	0	0	0	3	0	0	0	0
otu1973	52	13	1	0	0	0	0	0	0	0	0	0	0	0	0	0	0	0
otu1974	0	0	1	0	0	0	0	0	9	25	0	23	0	0	0	0	0	0
otu1975	0	0	1	0	0	0	0	0	0	0	0	0	0	0	46	0	0	0
otu1976	0	0	0	0	0	0	0	0	0	0	0	0	0	0	10	0	0	0
otu1977	0	0	0	0	0	0	0	15	0	0	0	0	0	0	0	0	0	0
otu1978	0	0	0	0	0	0	0	0	7	0	0	0	0	0	0	0	0	0
otu1979	0	13	0	0	0	0	0	0	0	0	0	0	0	0	0	0	0	0
otu1980	0	0	1	0	0	0	46	22	9	1	0	0	0	0	0	0	0	0
otu1981	0	0	0	0	0	0	0	0	0	0	0	0	0	0	61	0	0	0
otu1982	0	0	0	0	0	12	0	0	0	0	0	0	0	0	0	0	0	0
otu1983	0	0	0	0	0	0	2	0	0	0	17	0	0	0	0	0	0	0
otu1984	1	0	0	0	0	0	0	0	0	0	0	0	0	71	0	0	0	0
otu1985	0	0	0	0	35	0	0	0	0	0	0	0	0	0	0	0	0	0
otu1986	0	0	0	0	0	0	0	0	57	0	0	0	0	0	0	0	0	0
otu1987	1	3	1	0	1	0	1	0	1	1	0	1	2	1	1	0	0	0
otu1988	48	1	84	0	0	0	0	0	0	0	0	0	0	0	0	0	0	0
otu1989	0	0	7	0	0	0	0	0	0	0	0	0	0	0	0	0	0	0
otu1990	7	0	0	0	0	0	0	0	7	0	0	0	0	0	0	0	0	0
otu1991	0	0	0	0	0	0	0	50	0	0	0	0	0	0	0	0	0	0
otu1992	0	0	0	0	0	0	0	0	4	16	0	0	0	0	0	0	0	0
otu1993	10	1	0	0	0	0	0	0	0	0	0	0	0	0	0	0	0	0
otu1994	0	0	0	0	0	0	0	0	0	0	0	0	0	0	0	3	0	14
otu1995	0	0	0	0	0	0	60	0	0	0	0	0	0	0	0	0	0	0
otu1996	1	107	0	0	0	0	0	0	0	0	0	0	0	0	0	0	0	0
otu1997	0	0	0	0	0	0	0	5	0	2	3	0	0	0	0	0	0	0
otu1998	8	8	0	0	0	0	0	0	0	0	0	0	0	0	0	0	0	0
otu1999	0	0	6	0	0	0	29	0	0	0	0	0	0	0	0	0	0	0
otu2000	0	0	0	0	0	0	0	1	3	1	0	0	12	3	4	0	0	0
otu2001	0	0	0	0	0	0	0	78	0	0	0	0	0	0	0	0	0	0
otu2002	0	0	0	0	3	11	0	0	6	0	0	0	0	0	0	0	0	0
otu2004	0	0	0	0	11	0	0	0	0	0	0	0	0	0	0	0	0	0
otu2005	1	108	0	0	0	1	0	0	0	0	0	0	0	0	0	0	0	0
otu2006	0	0	0	0	0	0	0	0	26	0	0	0	0	0	0	0	0	0
otu2007	0	0	0	49	0	0	0	0	0	0	0	1	0	0	1	0	0	0
otu2008	9	1	0	0	0	0	0	0	0	0	0	0	0	0	0	0	0	0
otu2009	0	0	0	0	0	0	0	0	0	0	0	0	7	0	0	0	0	0
otu2010	0	0	0	0	0	0	4	0	0	0	1	0	0	9	0	0	0	0
otu2011	87	25	0	0	0	0	0	0	0	0	0	0	0	0	0	0	0	0
otu2012	1	0	11	0	0	0	0	0	0	0	0	0	0	0	0	0	0	0
otu2013	0	0	0	0	0	10	0	0	0	0	0	0	0	0	0	0	0	0
otu2014	0	0	0	0	0	0	0	5	0	26	0	0	0	0	0	0	0	0
otu2015	50	1	0	0	0	0	0	0	0	0	0	0	0	0	0	0	0	0
otu2016	0	0	0	0	0	0	1	5	2	0	52	0	0	0	0	0	0	0
otu2017	2	0	0	0	0	0	0	0	1	5	18	0	0	0	25	0	0	0
otu2018	0	0	0	0	0	70	0	0	0	0	0	0	0	0	0	0	0	0
otu2019	0	0	0	0	0	0	0	0	0	0	0	0	3	0	5	0	0	0
otu2020	0	0	0	0	0	0	70	0	0	0	0	0	0	0	0	0	0	0
otu2021	0	0	0	0	0	1	0	0	2	0	5	0	6	0	1	0	0	0
otu2022	0	0	0	0	0	0	0	1	0	0	5	0	0	4	0	0	0	0
otu2023	0	0	0	0	0	0	0	0	1	0	14	0	1	0	0	0	0	0
otu2024	0	0	2	0	0	0	0	0	0	0	0	0	88	0	0	0	0	0
otu2025	0	0	0	0	0	0	0	0	0	0	9	0	0	0	0	0	0	0
otu2026	0	0	0	0	0	0	0	0	0	28	0	0	0	0	0	0	0	0
otu2027	0	0	0	0	0	0	0	0	0	0	0	0	0	0	7	0	0	0
otu2028	0	0	0	0	0	0	3	0	2	0	0	0	0	8	0	0	0	0
otu2029	8	0	0	0	0	0	0	0	0	0	0	0	0	0	0	0	0	0
otu2030	0	0	0	0	0	0	0	0	0	0	0	0	0	0	34	0	0	0
otu2031	0	0	0	0	0	0	0	0	0	0	0	0	60	0	0	0	0	0
otu2032	0	0	0	0	0	0	0	1	2	1	0	1	3	0	0	0	0	0
otu2033	1	1	0	0	0	0	0	2	1	0	0	3	1	0	1	0	0	0
otu2034	1	8	0	0	0	0	0	0	0	0	0	0	0	0	0	0	0	0
otu2035	0	0	0	0	0	0	0	1	4	2	0	0	0	1	7	0	0	0
otu2037	0	0	0	0	0	0	0	0	0	29	0	0	0	0	0	0	0	0
otu2038	0	0	0	0	0	41	0	0	0	0	0	0	0	0	0	0	0	0
otu2039	0	0	0	0	0	0	0	0	0	73	0	0	0	0	0	0	0	0
otu2040	0	12	0	0	0	0	0	0	0	0	0	0	0	0	0	0	0	0
otu2041	0	0	1	0	0	1	4	3	3	0	2	12	3	0	3	0	0	0
otu2042	0	0	1	0	0	0	0	8	0	66	0	0	0	10	0	0	0	0
otu2043	6	2	0	0	0	0	0	0	0	0	0	0	0	0	0	0	0	0
otu2044	6	1	0	0	0	0	0	0	0	0	0	0	0	0	0	0	0	0
otu2045	0	0	10	0	0	0	0	0	0	2	0	0	0	0	0	0	0	0
otu2046	28	10	1	0	0	0	17	0	4	0	1	0	0	0	0	1	0	80
otu2047	1	2	3	0	0	0	2	2	2	0	1	4	7	0	0	0	0	0
otu2048	0	0	0	0	57	0	0	0	0	0	0	0	0	0	0	0	0	0
otu2049	0	0	0	0	0	0	0	27	9	2	11	0	0	2	0	0	0	0
otu2050	16	2	0	0	0	0	0	0	0	0	0	0	0	0	0	0	0	0
otu2051	0	1	0	20	0	0	0	17	27	0	0	0	0	0	0	0	0	0
otu2052	0	0	1	0	0	0	0	0	5	0	0	0	2	0	0	0	0	0
otu2053	0	0	0	0	0	0	0	0	0	0	0	0	25	0	0	0	0	0
otu2054	0	0	1	0	0	0	0	0	0	0	0	0	0	0	59	0	0	0
otu2055	0	9	0	0	0	0	0	0	0	0	0	0	0	0	0	0	0	0
otu2056	11	0	0	0	0	0	0	0	0	0	0	0	0	0	0	0	0	0
otu2057	0	0	0	0	0	0	0	1	8	0	0	0	0	0	0	0	0	0
otu2058	6	5	49	0	0	0	0	0	0	0	0	0	0	0	0	0	0	0
otu2059	0	0	0	0	0	0	0	0	7	45	11	0	0	5	23	1	0	0
otu2060	1	34	0	0	0	0	0	0	0	0	0	0	0	0	0	0	0	0
otu2061	0	0	0	0	0	0	0	0	0	0	0	0	0	5	18	0	0	0
otu2062	0	0	0	0	0	0	0	0	0	0	0	0	0	0	0	0	0	10
otu2063	0	0	0	0	0	0	0	0	0	56	0	0	0	0	0	0	0	0
otu2064	1	32	0	0	0	0	0	0	0	0	0	0	0	0	0	0	0	0
[truncated: 19,609 more rows]
